# Supplementary material
Source: PubMed Central journal article supplement (PMC6711172)
Supplement: NIHMS1034563-supplement-Table_S1.pdf [file NIHMS1034563-supplement-Table_S1.pdf]

|          | A549 V     | A549 V     | A549 T     | A549 T     | A549 P     | A549 P     |
|----------|------------|------------|------------|------------|------------|------------|
| S100A11  | 786.278399 | 743.969962 | 1123.19267 | 1101.09379 | 1127.47568 | 1147.79928 |
| TNFAIP2  | 986.278022 | 1174.27868 | 1707.92048 | 1365.73446 | 880.619733 | 933.318706 |
| CYP1B1   | 723.214252 | 784.074699 | 951.063216 | 1052.43156 | 684.934117 | 676.706896 |
| MAP1LC3B | 127.343674 | 132.925381 | 233.92343  | 246.491683 | 188.270125 | 176.990945 |
| SAT1     | 186.999401 | 204.580741 | 467.329759 | 501.16019  | 265.156199 | 246.84806  |
| OPTN     | 16.6996875 | 16.7336033 | 59.4977824 | 66.7583857 | 31.6221848 | 35.0892368 |
| TNFAIP3  | 25.5765055 | 34.3199045 | 242.689012 | 235.052241 | 40.1078884 | 49.1004299 |
| CDKN1A   | 130.839886 | 134.486379 | 409.793786 | 363.839751 | 176.49327  | 199.987055 |
| EPS8     | 14.6715922 | 14.9597738 | 37.3582908 | 46.1009382 | 17.4360504 | 18.6897781 |
| SQSTM1   | 975.390404 | 1025.07913 | 1093.34478 | 883.077588 | 775.983204 | 807.802785 |
| NPC1     | 88.7947094 | 95.8229791 | 85.0894982 | 75.1040992 | 84.575684  | 88.8653017 |
| CCND1    | 96.1179352 | 106.900282 | 59.2222949 | 54.9252908 | 168.957654 | 189.223989 |
| RNF149   | 85.7676368 | 92.4996978 | 84.5814497 | 98.6172449 | 99.9176108 | 98.4139961 |
| CCNE1    | 19.1998164 | 18.2844461 | 23.3325057 | 22.573516  | 32.4625802 | 38.8007189 |
| RAB27B   | 229.668392 | 236.977274 | 191.955717 | 233.821337 | 307.512827 | 277.947176 |
| ORC6     | 58.7288502 | 57.1820177 | 51.2434654 | 52.0927291 | 66.0205235 | 70.7387257 |
| WEE1     | 12.3653064 | 13.4717864 | 16.0022231 | 17.0101406 | 10.7570359 | 10.3393331 |
| IQGAP3   | 10.5002886 | 11.6233046 | 20.1268998 | 15.6839993 | 8.62950186 | 9.18563501 |
| NEURL1B  | 6.17981451 | 5.01589144 | 18.8304563 | 16.4593991 | 3.54943741 | 3.96143844 |
| ID1      | 189.572338 | 174.076208 | 158.888332 | 169.430181 | 110.92941  | 109.947851 |
| PIR      | 144.522529 | 122.999135 | 129.070036 | 150.945181 | 75.2987794 | 88.4161228 |
| COMMD4   | 77.488867  | 73.8171745 | 78.0549491 | 64.7452521 | 55.4833112 | 55.9297933 |
| IMPA2    | 62.0259723 | 60.0877995 | 65.7627312 | 59.6558404 | 36.250233  | 46.1110522 |
| RAD51AP1 | 39.1632165 | 35.8886723 | 27.9870514 | 56.5151626 | 30.789183  | 31.7804578 |
| NUCKS1   | 64.2612371 | 69.1685192 | 60.6154898 | 71.2239257 | 51.3921002 | 59.0497344 |
| RHNO1    | 122.224823 | 110.639352 | 105.627451 | 123.388675 | 83.9776473 | 98.5839656 |
| H2AFV    | 45.8966106 | 41.7811456 | 42.7003186 | 49.770049  | 30.9650551 | 33.2660856 |
| NUSAP1   | 61.8399586 | 61.1336554 | 58.7820167 | 69.1237314 | 24.9301951 | 25.1873438 |
| DUT      | 120.639971 | 119.533422 | 121.395568 | 143.725049 | 91.5295865 | 102.037499 |
| FAM111B  | 82.7409181 | 79.199443  | 83.3592153 | 99.5359935 | 68.7580639 | 69.8332928 |
| CENPM    | 26.0753078 | 21.7062174 | 13.9658705 | 7.92460003 | 9.89816144 | 10.4203055 |
| RNASEH2A | 44.562866  | 35.9969202 | 28.255893  | 28.5275647 | 25.1460844 | 25.4581927 |
| POLE2    | 68.7525611 | 53.311052  | 24.7379741 | 25.6773901 | 21.9825824 | 26.1326521 |
| HMGB3    | 232.259631 | 217.325849 | 160.035048 | 175.619547 | 157.686657 | 178.987538 |
| DEPDC1B  | 16.4657983 | 17.9094304 | 8.49375294 | 10.9083037 | 9.11770566 | 8.05603448 |
| NUF2     | 83.762411  | 81.4202715 | 38.0699285 | 52.0289007 | 43.7734295 | 38.9934447 |
| FAM83D   | 46.3803907 | 49.5505353 | 23.4753022 | 23.0843072 | 25.4812244 | 29.1958013 |
| CCNB1    | 164.621906 | 155.000512 | 67.6728521 | 71.3617678 | 83.85168   | 86.8502915 |
| AURKA    | 84.2137669 | 83.4296459 | 37.9009391 | 36.3344449 | 48.0662713 | 49.6185639 |
| PLK1     | 56.77739   | 56.9305341 | 25.2311098 | 20.7256325 | 26.4199854 | 28.0384338 |
| SGOL2    | 100.646832 | 98.013148  | 45.5322293 | 53.9712375 | 55.6277989 | 50.2739035 |
| UBE2C    | 171.695189 | 162.521735 | 75.973021  | 80.1760323 | 74.1953298 | 81.6277694 |

|        |            |            |            |            |            |            |
|--------|------------|------------|------------|------------|------------|------------|
| CDC20  | 122.82994  | 122.027438 | 47.3595592 | 43.3616113 | 78.7034909 | 82.6314671 |
| CHEK1  | 76.0120628 | 78.8218124 | 45.145539  | 53.9010538 | 52.3808633 | 63.5787689 |
| CTDSP1 | 102.011418 | 103.345767 | 91.9999053 | 86.7043606 | 83.6014438 | 87.5882356 |
| ASF1B  | 28.2023872 | 23.9616102 | 22.8891054 | 18.6801989 | 19.2669099 | 24.4439414 |
| FBXO5  | 14.8078097 | 14.2447969 | 10.4757941 | 10.3728505 | 9.74323791 | 11.7767418 |
| MCM6   | 66.7011634 | 59.9921681 | 41.0219783 | 46.6278508 | 43.4540065 | 49.2677398 |
| HELLS  | 130.62094  | 110.529848 | 88.548726  | 88.7600874 | 80.9749403 | 88.7374748 |
| BUB1B  | 166.22535  | 148.095492 | 112.926639 | 119.136547 | 93.5190402 | 114.386535 |
| TK1    | 131.572784 | 117.757563 | 99.9949464 | 83.8365886 | 84.0997036 | 91.6417221 |
| CDK2   | 30.9022255 | 30.2369967 | 26.9507237 | 29.1126517 | 24.8096107 | 26.5397828 |
| DEK    | 69.9660931 | 65.2471928 | 51.5443725 | 64.4527218 | 48.084457  | 54.0771893 |
| USP1   | 96.0325972 | 96.2903304 | 73.5233487 | 89.2785314 | 77.6849198 | 72.4637144 |
| CDK1   | 227.917567 | 221.290039 | 147.785567 | 213.052323 | 144.067316 | 134.750548 |
| CDCA3  | 29.8870799 | 26.9412463 | 19.6825668 | 17.9269915 | 10.9090375 | 13.0253818 |
| CCNB2  | 94.039506  | 82.8926077 | 59.5362546 | 53.7574975 | 41.0538468 | 43.6668392 |
| NCAPD2 | 645.325013 | 624.254896 | 419.207604 | 381.095684 | 287.392151 | 337.339547 |
| KIF2C  | 69.1115015 | 63.332899  | 46.0903547 | 38.8705036 | 33.6651408 | 35.1824371 |
| FOXM1  | 51.0615877 | 54.6245737 | 36.4713081 | 32.2340715 | 26.2539327 | 31.8055395 |
| BIRC5  | 62.8404779 | 57.9761872 | 33.9722504 | 34.6424891 | 32.3430933 | 33.6161514 |
| AURKB  | 81.5735515 | 85.4319574 | 45.6156069 | 47.4967363 | 41.5313674 | 42.2857492 |
| H2AFX  | 91.4940737 | 86.6824716 | 54.3876338 | 50.4375033 | 42.603666  | 51.3413099 |
| CENPA  | 31.6753496 | 34.4238454 | 20.69816   | 23.0297888 | 16.3357321 | 19.0463862 |
| CCNA2  | 34.7851055 | 39.058318  | 22.7664161 | 27.3691943 | 18.9110082 | 21.785964  |
| NASP   | 191.620512 | 205.033032 | 160.328193 | 173.67997  | 138.729439 | 148.900681 |
| KIF11  | 36.4779083 | 36.2921019 | 23.1697815 | 25.6247824 | 20.1345816 | 22.4872765 |
| TOP2A  | 158.886886 | 159.617401 | 103.467163 | 105.937104 | 85.7142319 | 98.1165503 |
| TMPO   | 75.6067651 | 76.0142018 | 47.7476058 | 60.4324908 | 43.7379049 | 49.4503924 |
| HMMR   | 127.652897 | 126.279112 | 71.2026631 | 91.5404052 | 65.8350586 | 68.1553105 |
| MKI67  | 39.2914461 | 39.6484686 | 30.4868702 | 28.2593624 | 19.6542879 | 21.7583316 |
| PRC1   | 107.294301 | 112.551817 | 87.924407  | 86.8939905 | 62.4933977 | 74.4713542 |
| LMNB1  | 39.7840834 | 45.483298  | 33.387875  | 36.1064745 | 26.1689632 | 31.2429245 |
| SMC4   | 311.776879 | 337.723206 | 242.381233 | 270.30945  | 228.724987 | 249.314639 |
| DLGAP5 | 39.3153116 | 36.5052431 | 24.0530679 | 25.9777751 | 17.2861004 | 17.5855883 |
| TYMS   | 79.7119581 | 73.5771167 | 55.4144229 | 59.5409105 | 41.2508292 | 46.2894797 |
| HMGB2  | 64.3310138 | 54.1949086 | 39.2327844 | 45.6647032 | 28.9703755 | 28.4517367 |
| SPC24  | 53.15812   | 43.4245376 | 35.5214084 | 35.6904712 | 21.8544059 | 27.2607044 |
| CDKN3  | 105.489165 | 97.6918772 | 68.40155   | 75.3348964 | 45.4710833 | 44.3505744 |
| KIF20A | 184.662427 | 184.859998 | 126.286882 | 132.857967 | 58.3556643 | 68.3677728 |
| SPC25  | 58.0611749 | 49.0605579 | 39.855856  | 48.3252797 | 26.7262747 | 29.2534752 |
| STMN1  | 118.840789 | 110.880667 | 100.28106  | 107.230723 | 67.3185061 | 65.7303285 |
| MYBL2  | 65.2107087 | 61.0268733 | 61.7550789 | 53.6998419 | 35.0756565 | 40.0504579 |
| H1FX   | 59.840452  | 66.0616641 | 53.9521873 | 44.7264647 | 30.6440672 | 39.0035422 |
| HMGN2  | 354.517198 | 404.166576 | 340.64853  | 350.667176 | 248.576793 | 226.372996 |

|          |            |            |            |            |            |            |
|----------|------------|------------|------------|------------|------------|------------|
| EZH2     | 15.4204642 | 17.4703191 | 12.6474555 | 12.3585348 | 9.5545279  | 8.63946639 |
| CDK4     | 73.9112959 | 74.0122232 | 60.7399657 | 58.9993344 | 64.6770775 | 64.3325868 |
| MCM3     | 69.3532053 | 66.469208  | 51.5194303 | 50.7505923 | 60.1804063 | 66.1163819 |
| EXO1     | 112.465961 | 103.96908  | 69.4221144 | 73.3394332 | 85.842104  | 87.5627384 |
| DNMT1    | 50.2763206 | 60.7656886 | 37.7900025 | 33.3111319 | 43.7912882 | 51.1829306 |
| HMGA1    | 473.164063 | 491.044026 | 46.46657   | 46.8621163 | 348.244095 | 368.929064 |
| MT-ND2   | 1500.23088 | 1770.99648 | 1650.51499 | 1438.32214 | 2002.95463 | 1153.71382 |
| L1CAM    | 1.69227912 | 2.06771068 | 4.18653804 | 3.61518081 | 3.70033427 | 4.32413126 |
| STXBP1   | 80.408215  | 86.179487  | 68.6816118 | 55.3344422 | 87.6636316 | 89.548316  |
| GM2A     | 77.5380735 | 85.3933353 | 90.7534085 | 86.7718014 | 108.893105 | 96.8636171 |
| CSTB     | 52.8926981 | 48.9589693 | 47.7352549 | 53.0008059 | 50.5069994 | 53.4347773 |
| RHOB     | 41.4229944 | 39.2966294 | 136.427007 | 132.162009 | 47.4290306 | 48.7265696 |
| KRT8     | 1435.86333 | 1296.08135 | 1667.06668 | 1553.58563 | 1500.33728 | 1674.56907 |
| MUC1     | 1.48643136 | 1.65403534 | 14.0050459 | 9.27886125 | 4.60573777 | 4.36720699 |
| DDR1     | 117.154521 | 119.635377 | 222.884609 | 183.650467 | 124.231075 | 124.499162 |
| CLU      | 277.433313 | 255.151694 | 170.535975 | 156.27979  | 204.165375 | 194.632191 |
| GAS6     | 3.05207165 | 2.73028719 | 5.23461516 | 4.1632529  | 1.99902079 | 2.92111171 |
| IL6      | 0.12592044 | 0.11539189 | 0.47119951 | 0.24454657 | 0.9325944  | 0.82400255 |
| NFKB2    | 159.093308 | 151.434605 | 193.00336  | 166.113263 | 165.429778 | 195.422446 |
| CX3CL1   | 0.23159351 | 0.31834402 | 0.43331626 | 0.11244282 | 0          | 0.16237603 |
| CCL2     | 38.1847392 | 38.0116232 | 272.540584 | 295.877194 | 79.7759034 | 79.9091419 |
| NFE2L2   | 303.845472 | 288.121623 | 298.08754  | 357.829144 | 257.092999 | 258.366321 |
| SERPINE1 | 145.687148 | 155.213664 | 1634.88175 | 1543.79231 | 728.425724 | 716.521763 |
| CXCL11   | 0          | 0          | 0          | 0.34877579 | 0          | 0          |
| ACVRL1   | 0          | 0.6326873  | 2.58356067 | 1.34083525 | 0          | 0.96813431 |
| PVR      | 48.7496161 | 53.2054814 | 60.3748992 | 54.4130098 | 67.4254334 | 68.4402529 |
| CD82     | 4.64618343 | 7.20534399 | 9.36180582 | 7.6350349  | 9.83161523 | 11.0255741 |
| PLAU     | 387.437019 | 419.424361 | 447.394871 | 483.534413 | 380.361018 | 389.842999 |
| IL15     | 5.58105155 | 4.99263296 | 7.70738462 | 8.51620341 | 5.48314685 | 5.34157677 |
| SGMS2    | 41.9581191 | 45.1104955 | 46.3609309 | 56.783336  | 59.4237067 | 65.4760431 |
| ATP2C1   | 19.8259777 | 19.6462479 | 20.4978293 | 24.8668293 | 22.4332073 | 22.248141  |
| CD40     | 2.8914363  | 1.83439064 | 4.78571368 | 3.56360507 | 3.29455559 | 2.80697355 |
| BST2     | 0.1886953  | 0          | 1.05915846 | 0.54968982 | 0.19964554 | 0.52919608 |
| ITGA5    | 13.0470565 | 13.0142232 | 33.3045198 | 26.9826991 | 21.8261011 | 21.191535  |
| HIF1A    | 491.536413 | 515.056128 | 708.25901  | 775.570049 | 763.168478 | 789.422024 |
| ATP2A2   | 1517.88928 | 1641.45636 | 2190.86861 | 2223.94698 | 1819.02752 | 1800.56083 |
| CSF1     | 129.964299 | 156.353808 | 166.475113 | 133.966173 | 112.120521 | 112.149215 |
| IGFBP7   | 9.679174   | 8.86987166 | 164.730755 | 184.361601 | 80.9422555 | 74.4754262 |
| KLF6     | 84.0598059 | 92.4837281 | 155.158628 | 158.118084 | 84.9436906 | 81.8757771 |
| IFNAR1   | 204.586467 | 214.968163 | 236.722622 | 257.661605 | 193.673745 | 207.791311 |
| PSEN1    | 152.544786 | 135.469874 | 219.88884  | 230.527972 | 184.911981 | 185.731452 |
| TAPBP    | 26.0875398 | 27.2344194 | 62.9748928 | 53.0480652 | 34.7453351 | 37.6810887 |
| IRF1     | 7.0916535  | 6.20330537 | 13.9722701 | 13.1986479 | 7.50319156 | 7.58376381 |

|         |            |            |            |            |            |            |
|---------|------------|------------|------------|------------|------------|------------|
| IL1R1   | 103.87568  | 100.108999 | 231.570185 | 250.787931 | 107.8994   | 97.4016238 |
| NAMPT   | 91.1884673 | 88.101706  | 144.78371  | 177.339069 | 98.9222312 | 95.1711378 |
| CXCL10  | 0.16350384 | 0          | 0.4588786  | 0.63507248 | 0          | 0.15284887 |
| IL15RA  | 4.08486677 | 2.94117987 | 5.45919308 | 5.94982924 | 4.321917   | 4.90971904 |
| IFNGR1  | 20.4955387 | 20.4293811 | 51.8869631 | 61.9752355 | 26.1550594 | 24.8742776 |
| TNFRSF9 | 1.1998784  | 1.00792383 | 4.39645313 | 5.04887573 | 2.32743306 | 2.05642534 |
| HLA-C   | 53.5529284 | 50.2436785 | 151.013662 | 149.071893 | 81.2136354 | 79.385729  |
| HLA-B   | 27.5780817 | 23.1661857 | 116.81477  | 95.7112416 | 42.1466852 | 41.0584945 |
| HLA-A   | 35.6151274 | 32.0712849 | 71.2588356 | 63.2699454 | 44.5430794 | 43.3017244 |
| TAP1    | 12.0269873 | 13.9326852 | 26.7485428 | 20.1254518 | 15.1258594 | 14.3545652 |
| ATF3    | 3.67595101 | 3.36859464 | 43.6474529 | 40.3625916 | 2.99174717 | 3.96507947 |
| IFIT2   | 1.15732038 | 0.70703576 | 3.50583778 | 3.79951358 | 1.34109847 | 1.54557411 |
| GADD45A | 9.12561264 | 10.3649066 | 25.8517972 | 20.842773  | 25.701828  | 21.8680141 |
| RCAN1   | 39.0970379 | 48.162266  | 109.12745  | 119.495237 | 64.4222891 | 77.2926158 |
| FOSL2   | 302.364778 | 384.688365 | 1170.82467 | 1120.74294 | 493.326167 | 549.770544 |
| BIRC2   | 67.7998992 | 74.8056799 | 93.3652914 | 108.234623 | 76.32542   | 71.4944654 |
| NINJ1   | 41.578222  | 36.1760323 | 54.3432626 | 45.7668624 | 35.5739991 | 44.2008859 |
| PNRC1   | 27.0983568 | 20.2979421 | 77.8159135 | 81.6861973 | 43.380334  | 43.6158742 |
| KDM6B   | 45.1487395 | 58.4099708 | 171.432989 | 121.723394 | 73.620121  | 108.2474   |
| DNAJB4  | 36.4704874 | 37.6915623 | 58.3805763 | 70.238079  | 60.4528385 | 51.7089816 |
| STAT1   | 373.540426 | 375.262772 | 746.381619 | 756.983403 | 487.578077 | 579.647173 |
| ISG15   | 1.8930571  | 4.2130211  | 7.33689444 | 7.09030284 | 5.72261062 | 5.561893   |
| XAF1    | 0          | 0          | 0.2199027  | 0.22825343 | 0          | 0          |
| MX1     | 1.00934653 | 1.15619037 | 11.3310496 | 12.4964261 | 3.47074081 | 4.24606936 |
| IFIT3   | 1.77181564 | 1.20010337 | 4.68438573 | 5.90953259 | 3.2602373  | 2.73658263 |
| B2M     | 153.824411 | 148.154706 | 312.981428 | 399.442443 | 200.710474 | 174.509737 |
| STAT3   | 35.1644372 | 37.1818177 | 47.2956819 | 46.5390976 | 41.1150354 | 48.3655371 |

| A549 C     | A549 C     | H2030 V    | H2030 V    | H2030 T    | H2030 T    | H2030 P    |
|------------|------------|------------|------------|------------|------------|------------|
| 1350.74859 | 1346.59035 | 1239.15095 | 1229.96968 | 1578.98103 | 1574.87376 | 1459.70093 |
| 2003.94581 | 1857.38574 | 144.827353 | 141.817478 | 722.063542 | 648.257414 | 204.139352 |
| 1261.94505 | 1252.08492 | 3357.13768 | 3537.42967 | 5572.79591 | 6069.18985 | 3750.10437 |
| 306.3912   | 325.828305 | 332.242234 | 329.27653  | 522.429669 | 501.50381  | 548.181597 |
| 572.105047 | 575.01984  | 204.981094 | 208.014111 | 142.465631 | 161.618853 | 256.24377  |
| 74.864154  | 79.6104658 | 66.4840494 | 68.3325269 | 154.329673 | 148.176088 | 99.3550569 |
| 299.639366 | 254.188987 | 105.920362 | 117.357759 | 293.167321 | 309.75359  | 205.181353 |
| 480.423899 | 402.613327 | 159.395631 | 167.95248  | 314.506256 | 329.097008 | 246.163812 |
| 32.3778253 | 32.8445676 | 18.2970109 | 19.393922  | 16.6728854 | 15.9875792 | 20.281603  |
| 1083.124   | 991.41655  | 577.36291  | 573.361351 | 1021.36026 | 1032.04095 | 736.838979 |
| 92.843345  | 86.2177563 | 98.1114056 | 94.2953558 | 125.894855 | 123.585077 | 118.960097 |
| 133.600859 | 136.808186 | 41.1540314 | 45.1943333 | 20.1315746 | 20.2831517 | 45.2591976 |
| 88.5178663 | 82.3766002 | 47.7715327 | 54.733715  | 53.0183734 | 64.4763069 | 53.8552441 |
| 19.2311139 | 21.1731771 | 14.7035147 | 13.378303  | 8.7750501  | 6.042233   | 14.3121413 |
| 158.239872 | 180.672024 | 98.4724518 | 122.075228 | 32.7201087 | 39.9313492 | 85.8221783 |
| 43.7227566 | 43.3589844 | 64.3849557 | 60.7169137 | 38.7283461 | 32.5351008 | 70.4381855 |
| 9.31594165 | 8.60069668 | 11.7320369 | 12.0183024 | 10.0385119 | 9.10320264 | 10.4464825 |
| 5.29613024 | 4.99392359 | 34.3994052 | 31.5121989 | 17.8482044 | 19.1878388 | 16.8513105 |
| 4.52999888 | 3.79945549 | 7.19589904 | 3.86125211 | 4.11557102 | 3.19717224 | 1.57941472 |
| 141.975718 | 138.87889  | 150.352198 | 138.36558  | 70.5817882 | 63.8453425 | 61.1395567 |
| 95.8146765 | 102.585298 | 244.733995 | 238.346129 | 214.074706 | 214.524548 | 158.533752 |
| 52.5086247 | 46.8860642 | 103.344344 | 107.716992 | 67.3684054 | 70.4531512 | 73.7928607 |
| 40.8661666 | 36.9790323 | 28.3738231 | 18.0317805 | 15.6226843 | 11.1827361 | 10.2746871 |
| 15.6996178 | 20.7492187 | 25.0707798 | 31.472345  | 10.7279785 | 11.6400585 | 11.3530206 |
| 43.0155133 | 42.9360112 | 55.376393  | 57.1517769 | 35.6646433 | 37.8108929 | 33.5676686 |
| 76.8246799 | 63.7844636 | 150.782175 | 145.324509 | 83.5170103 | 92.3183485 | 95.5545902 |
| 28.4841032 | 28.5768194 | 40.4647714 | 39.9782716 | 21.3434702 | 25.08696   | 22.9089869 |
| 19.2217944 | 19.935354  | 94.6403175 | 89.7763576 | 35.1175641 | 36.4145355 | 39.4273852 |
| 79.5772267 | 80.6499533 | 124.276952 | 138.562287 | 62.4079025 | 66.4747737 | 76.9138881 |
| 25.4761703 | 24.5740044 | 64.3601354 | 65.6253094 | 21.6224667 | 21.5057178 | 21.9742263 |
| 3.83009998 | 4.86731488 | 24.1432948 | 23.2154785 | 9.27920671 | 11.7957783 | 11.4744643 |
| 16.0305301 | 15.820737  | 65.5029763 | 74.5934249 | 25.1540331 | 24.4521929 | 34.6129074 |
| 6.92277403 | 6.65091325 | 66.3474817 | 65.7446445 | 25.06101   | 16.1680184 | 28.159506  |
| 129.833347 | 133.539844 | 452.329648 | 420.292104 | 159.700589 | 147.515357 | 210.030882 |
| 2.9610857  | 4.06400341 | 20.6812681 | 20.4720528 | 8.00159131 | 7.40953303 | 10.0181283 |
| 12.1185174 | 15.5898293 | 65.8128333 | 55.0024127 | 24.3215674 | 20.0965112 | 28.3124712 |
| 8.75584069 | 8.43479119 | 35.5066219 | 35.6071799 | 16.71555   | 15.3464268 | 20.3849793 |
| 26.7241739 | 29.5679617 | 105.461652 | 99.3551438 | 57.6186511 | 60.1957222 | 67.8441996 |
| 18.1857209 | 20.2142905 | 118.290622 | 108.756087 | 62.4384558 | 59.7971121 | 77.6381046 |
| 5.53905632 | 5.45798443 | 25.8097719 | 24.405728  | 11.3390853 | 9.83623378 | 9.98297049 |
| 22.5736518 | 24.9784515 | 85.1268432 | 92.8035353 | 38.7852996 | 45.7470388 | 39.1176604 |
| 18.6548399 | 22.3475032 | 236.407053 | 225.086014 | 68.9516437 | 72.0548589 | 114.665508 |

|            |            |            |            |            |            |            |
|------------|------------|------------|------------|------------|------------|------------|
| 17.7762372 | 16.0563855 | 137.678876 | 132.84148  | 58.9690923 | 54.6115194 | 74.7322467 |
| 36.6573939 | 35.4624081 | 97.2930199 | 100.246942 | 76.8869109 | 73.2647194 | 78.2826942 |
| 79.1261622 | 66.7587533 | 120.350823 | 122.152626 | 72.5922203 | 72.8882054 | 78.5346887 |
| 8.98464445 | 10.6870066 | 28.3629658 | 26.7188707 | 8.45570181 | 8.6854701  | 12.344595  |
| 3.24017654 | 4.61175287 | 20.230638  | 18.5273528 | 6.34038103 | 5.82105843 | 6.80963747 |
| 22.8247714 | 25.0696941 | 43.2988021 | 46.2865788 | 19.3788078 | 18.7658436 | 19.1313794 |
| 45.8426876 | 42.5875676 | 52.7460701 | 54.7051446 | 21.5776944 | 18.0296232 | 27.1477176 |
| 36.5666149 | 45.1633389 | 220.82294  | 198.344507 | 96.9817287 | 99.6250935 | 123.253948 |
| 34.7391009 | 27.7257563 | 90.0807092 | 83.4050023 | 37.6946947 | 35.8709764 | 41.086126  |
| 16.7283287 | 15.7273628 | 54.6085997 | 60.2837145 | 34.4608063 | 33.706077  | 40.0363745 |
| 27.5047448 | 32.433957  | 109.105656 | 119.069404 | 59.6561493 | 56.6170971 | 58.6655553 |
| 33.1455909 | 37.9094607 | 133.718706 | 134.395247 | 57.9101151 | 56.5340966 | 61.2062997 |
| 41.6702164 | 49.6845808 | 196.64383  | 191.198069 | 52.452841  | 53.6289161 | 80.0913993 |
| 4.08543998 | 2.79383874 | 28.5277172 | 28.6928805 | 11.7417654 | 11.9268425 | 10.9403082 |
| 17.5505224 | 18.1304351 | 60.1946336 | 51.0074258 | 27.5850888 | 24.3085773 | 28.4944279 |
| 135.758681 | 129.461241 | 499.035951 | 466.511488 | 213.702868 | 218.691509 | 231.032674 |
| 9.87511543 | 8.53356351 | 131.634742 | 111.91877  | 49.3826274 | 48.0130506 | 63.4196836 |
| 11.6210088 | 10.8410331 | 44.3574155 | 39.8442849 | 20.0210895 | 17.9727474 | 21.2648013 |
| 8.38355341 | 8.81050422 | 42.4638432 | 42.7832004 | 16.1506063 | 14.5358711 | 17.4120131 |
| 10.6778545 | 8.99871037 | 66.0615995 | 66.3652707 | 17.5953158 | 16.0279293 | 24.3839465 |
| 19.7580003 | 15.7310169 | 86.5848559 | 89.6646616 | 35.9924162 | 37.652943  | 40.3768467 |
| 6.27147166 | 5.29344668 | 28.1104699 | 26.9768233 | 9.56076185 | 14.4110951 | 12.6562371 |
| 6.17307498 | 7.86719574 | 42.6257509 | 46.4163021 | 17.6261799 | 18.1062597 | 16.3300301 |
| 95.3493311 | 103.289545 | 244.858755 | 230.932918 | 97.4316704 | 100.134776 | 131.852215 |
| 7.1416391  | 8.04921682 | 32.4018516 | 31.0032326 | 10.2859962 | 10.615796  | 13.6450382 |
| 27.1100304 | 28.93934   | 225.236764 | 209.953069 | 64.0059978 | 59.972799  | 86.0290024 |
| 21.3896909 | 20.8822266 | 73.2770512 | 71.6594733 | 47.950813  | 49.4702486 | 30.364825  |
| 20.5548699 | 23.5091309 | 90.9574489 | 89.5488719 | 38.7852996 | 39.1253953 | 42.9995656 |
| 6.66652771 | 7.19873184 | 35.5280351 | 31.2596294 | 14.2831425 | 15.1370718 | 16.4879165 |
| 28.918896  | 32.3579863 | 81.6054187 | 75.648534  | 37.6688693 | 39.4346011 | 43.5885145 |
| 12.1174444 | 11.040835  | 39.356169  | 38.2172289 | 11.1612373 | 11.1579011 | 11.6590349 |
| 112.230585 | 128.03843  | 209.24298  | 207.127135 | 94.2241741 | 93.8830663 | 110.940499 |
| 4.711775   | 6.04838844 | 61.9615349 | 60.3191564 | 30.0525529 | 29.3590028 | 33.059171  |
| 19.5053949 | 22.0663322 | 74.7664673 | 75.5845328 | 28.1075443 | 25.8053352 | 27.941956  |
| 9.51340874 | 10.0557849 | 43.9533219 | 45.6328866 | 16.9732739 | 14.6614635 | 16.2882891 |
| 6.9583175  | 7.72495927 | 64.8459149 | 66.1513921 | 11.4374764 | 12.0007603 | 30.492934  |
| 16.6211886 | 22.3831493 | 152.458915 | 157.912742 | 78.5588393 | 75.5697366 | 80.1604545 |
| 18.4281831 | 25.9308321 | 225.90594  | 206.024725 | 138.777476 | 123.899291 | 83.5913373 |
| 8.63649996 | 11.8006618 | 72.0708595 | 72.4864909 | 24.6738725 | 28.5488674 | 21.3592614 |
| 39.6242424 | 47.1501133 | 223.937116 | 223.157038 | 119.978954 | 120.891843 | 120.689253 |
| 15.0881847 | 14.8234914 | 95.2339629 | 88.6312087 | 34.880805  | 32.8034233 | 35.2672114 |
| 23.8498064 | 21.9647354 | 74.7803231 | 74.6391307 | 31.7991987 | 32.2400982 | 28.533222  |
| 171.229407 | 172.204384 | 511.92718  | 544.775915 | 252.643132 | 278.438733 | 233.51153  |

|            |            |            |            |            |            |            |
|------------|------------|------------|------------|------------|------------|------------|
| 5.5647429  | 5.2170771  | 9.4801389  | 7.74729323 | 3.3614163  | 3.12955833 | 3.46421475 |
| 45.0645579 | 38.0494603 | 54.8234216 | 50.9746657 | 28.8959201 | 29.8071629 | 35.4417315 |
| 34.9168959 | 36.2359357 | 69.6571097 | 69.1042642 | 33.9949719 | 32.3398691 | 49.3424936 |
| 25.3850881 | 28.3883844 | 227.863671 | 227.795661 | 88.9984766 | 92.295727  | 80.9673543 |
| 19.1901131 | 18.9653493 | 84.9677924 | 78.0321737 | 28.9712789 | 29.8719635 | 43.0520681 |
| 28.4200764 | 28.958794  | 566.157404 | 554.4678   | 118.127816 | 115.146889 | 481.060503 |
| 1670.37203 | 2097.86279 | 1371.7703  | 1289.31544 | 1431.30907 | 1258.9418  | 1974.91714 |
| 8.02875252 | 7.17274479 | 4.81683522 | 5.44836417 | 48.5142848 | 50.9477807 | 16.2964214 |
| 109.554787 | 95.7462784 | 60.0446376 | 59.8880202 | 72.7126424 | 71.9363754 | 86.5203381 |
| 123.934555 | 132.977507 | 225.717191 | 217.658886 | 203.550738 | 191.743612 | 343.167118 |
| 42.6003446 | 45.3879475 | 54.8610667 | 52.7313956 | 70.6092884 | 68.7037283 | 63.3496451 |
| 94.4801055 | 95.0672779 | 29.4971621 | 27.9942813 | 110.534834 | 108.486848 | 32.3886554 |
| 2143.55167 | 1914.34654 | 183.771038 | 182.04437  | 175.460203 | 176.944535 | 256.370359 |
| 18.1924462 | 14.9544554 | 45.7433715 | 39.9554842 | 78.6223878 | 69.7357817 | 43.5826016 |
| 330.466468 | 310.628844 | 184.540263 | 183.82092  | 271.049665 | 275.44163  | 242.019413 |
| 245.972005 | 218.543323 | 174.463838 | 170.312246 | 225.100252 | 223.92766  | 182.546496 |
| 4.86072401 | 4.62008618 | 16.7822725 | 16.75234   | 14.2672052 | 13.8761625 | 21.0176763 |
| 0.57689784 | 0.6158253  | 130.617786 | 150.994681 | 263.253492 | 238.37463  | 209.506724 |
| 191.54589  | 168.328723 | 431.589319 | 427.722989 | 561.30564  | 545.743648 | 547.143543 |
| 0.53051671 | 0.2265258  | 0          | 0          | 0          | 0.04765433 | 0          |
| 298.199538 | 298.41429  | 1075.08846 | 1151.54449 | 1898.25543 | 1831.63645 | 1867.74547 |
| 258.662225 | 303.396959 | 476.084973 | 477.094826 | 487.586623 | 476.519199 | 400.699249 |
| 2325.36056 | 2195.91495 | 3.80177425 | 4.44876159 | 56.5230559 | 55.465426  | 9.94486645 |
| 0.54851992 | 0.46842602 | 0.11617645 | 0.1090936  | 2.68336098 | 3.54754728 | 0.594985   |
| 0.94892962 | 1.68826792 | 0.33497196 | 0.94364981 | 1.23791102 | 1.70477586 | 1.71552227 |
| 69.4140827 | 64.8215674 | 42.3100314 | 42.1017285 | 67.3445001 | 72.6330225 | 57.6488746 |
| 7.85953602 | 7.69071939 | 58.2627068 | 55.3619581 | 49.0223117 | 43.8303789 | 85.6083875 |
| 580.129204 | 573.863912 | 156.67884  | 165.096373 | 38.6748002 | 33.8162449 | 187.434004 |
| 8.76661447 | 6.8886465  | 4.38403525 | 4.84324297 | 6.67120257 | 8.09346366 | 4.49047141 |
| 43.5920658 | 50.7344817 | 56.4226311 | 63.8201283 | 72.5650889 | 86.471973  | 61.0761299 |
| 25.3391516 | 27.7415439 | 15.8790964 | 15.1977556 | 22.6053619 | 24.3153191 | 20.1743734 |
| 7.13297972 | 6.30898596 | 0.10791173 | 0.10133274 | 0          | 0.18306539 | 0.55265813 |
| 3.45799017 | 3.87589204 | 0.18310047 | 0.1719375  | 6.93576396 | 7.7654576  | 1.31282067 |
| 42.0713024 | 39.4893167 | 84.3267104 | 86.7254343 | 123.280736 | 125.188876 | 150.255577 |
| 1031.26299 | 1079.99013 | 601.793607 | 645.027691 | 368.502747 | 398.622749 | 531.276684 |
| 2068.58704 | 2051.73829 | 945.594185 | 958.158945 | 957.697925 | 971.399441 | 933.147473 |
| 146.260698 | 146.02552  | 24.8988084 | 23.9881124 | 63.6338826 | 60.6160585 | 37.0957161 |
| 324.739087 | 322.619012 | 12.8239459 | 11.5332947 | 26.0320823 | 32.9389212 | 11.840259  |
| 119.455003 | 113.483867 | 123.083781 | 145.162737 | 283.162018 | 281.926565 | 241.888191 |
| 260.048468 | 255.779344 | 417.191499 | 430.301796 | 635.044638 | 678.618991 | 504.528237 |
| 267.825275 | 260.535517 | 238.534062 | 223.684668 | 447.40077  | 457.318814 | 386.569358 |
| 81.6007947 | 69.2953365 | 74.3537948 | 69.8207138 | 121.981493 | 115.947888 | 90.7501695 |
| 18.7063838 | 16.2376562 | 9.22731229 | 10.7697539 | 20.0844059 | 17.6876251 | 10.4658842 |

|            |            |            |            |            |            |            |
|------------|------------|------------|------------|------------|------------|------------|
| 245.906255 | 284.425741 | 141.84935  | 139.242838 | 159.358684 | 171.25346  | 128.347545 |
| 152.152435 | 179.042914 | 31.1915772 | 33.8402048 | 37.0566178 | 37.8898404 | 26.6101391 |
| 0.74908418 | 0.95955636 | 0.63462375 | 1.04288282 | 9.67433776 | 8.88194023 | 1.30006245 |
| 9.35730041 | 8.84713877 | 14.1562506 | 15.9518344 | 18.048799  | 20.4129017 | 10.1499565 |
| 63.5055287 | 68.6699624 | 33.9314538 | 29.6512211 | 51.8990867 | 50.4597184 | 39.0438111 |
| 5.31394007 | 5.67250999 | 1.06727676 | 2.2777472  | 4.30275468 | 4.19722378 | 2.68328023 |
| 265.678898 | 239.955267 | 633.47907  | 642.028542 | 1581.13252 | 1516.06388 | 763.929801 |
| 229.765307 | 195.565997 | 1027.05384 | 1008.41368 | 2720.06451 | 2761.87915 | 1308.8314  |
| 102.239885 | 96.8556055 | 257.295765 | 258.773396 | 540.668737 | 526.883887 | 301.805183 |
| 41.2391174 | 34.1816474 | 73.2518582 | 83.0531861 | 314.039203 | 309.422631 | 137.881289 |
| 45.6007198 | 55.315602  | 12.8959279 | 12.3673634 | 126.242348 | 122.65152  | 33.1630637 |
| 13.381748  | 14.7698523 | 3.58292308 | 3.81643104 | 28.2110838 | 26.0364732 | 6.62774745 |
| 40.3952657 | 37.0865968 | 20.4538895 | 20.6122723 | 102.66697  | 96.4793741 | 53.9091405 |
| 169.137215 | 177.415574 | 226.382984 | 228.933638 | 407.963892 | 389.847197 | 243.34569  |
| 1344.4723  | 1245.20628 | 361.289847 | 332.576129 | 627.670497 | 572.635514 | 370.061288 |
| 88.7135429 | 102.127113 | 127.10556  | 135.171735 | 151.469937 | 176.563724 | 147.172937 |
| 64.0921337 | 56.3778688 | 40.7823787 | 32.1413067 | 37.5439278 | 41.1401941 | 33.8655613 |
| 69.0919997 | 87.5830365 | 35.898239  | 37.5744547 | 53.023476  | 53.1412342 | 43.7958539 |
| 282.771415 | 224.440763 | 54.6337418 | 51.3029208 | 82.3800715 | 74.3210067 | 73.9096278 |
| 79.8307457 | 78.6775549 | 30.4739771 | 38.5855656 | 65.9363716 | 77.04545   | 46.518673  |
| 1336.39872 | 1408.42033 | 422.406716 | 503.415112 | 1486.15232 | 1402.61827 | 698.13942  |
| 70.126922  | 60.0458251 | 71.1153483 | 90.4359823 | 448.767554 | 441.614475 | 186.270973 |
| 8.39999923 | 14.2549253 | 1.59664508 | 3.64116546 | 45.5182    | 40.2421582 | 10.5133412 |
| 114.450625 | 123.160696 | 77.6189819 | 128.069296 | 629.342102 | 591.70973  | 243.024667 |
| 22.3760088 | 25.6942744 | 7.92364364 | 12.5647325 | 75.8992953 | 71.394547  | 23.3526843 |
| 459.415468 | 538.886853 | 489.675685 | 523.978384 | 1102.12066 | 1110.12718 | 603.860437 |
| 58.786381  | 58.4677255 | 118.44667  | 106.781944 | 183.786801 | 183.283109 | 144.041871 |



| H2030 P    | H2030 C    | H2030 C    | H460 V     | H460 V     | H460 T     | H460 T     |
|------------|------------|------------|------------|------------|------------|------------|
| 1384.35677 | 1637.47221 | 1613.12622 | 710.92289  | 845.212371 | 944.819173 | 913.999904 |
| 194.704942 | 853.906586 | 907.752938 | 906.186694 | 846.800838 | 461.344671 | 626.166726 |
| 3874.18147 | 5338.75375 | 5252.00753 | 2107.91493 | 1763.54    | 2164.94028 | 2196.023   |
| 520.736222 | 774.765314 | 730.990189 | 99.0035888 | 100.507984 | 179.170596 | 149.877591 |
| 271.192235 | 170.96897  | 173.575373 | 93.9359893 | 96.8670357 | 210.863014 | 187.757486 |
| 102.507176 | 201.56467  | 189.861356 | 3.39298014 | 4.16774769 | 12.209653  | 9.6412333  |
| 210.175603 | 258.61091  | 271.259265 | 271.836721 | 222.696395 | 225.624412 | 269.116011 |
| 251.716972 | 389.062866 | 434.028441 | 110.424901 | 120.904551 | 72.5642578 | 104.681299 |
| 16.0318258 | 14.6528345 | 13.6731984 | 3.49406659 | 3.57659722 | 7.22127856 | 5.98981495 |
| 793.884291 | 880.401198 | 979.623945 | 989.236969 | 1096.02295 | 1169.97543 | 1336.90738 |
| 112.278178 | 140.129472 | 143.838309 | 58.44906   | 47.6500345 | 47.358384  | 54.4108876 |
| 45.5958187 | 26.535611  | 28.5858613 | 43.049209  | 34.2637752 | 13.1900326 | 13.4497538 |
| 64.4972167 | 71.0330052 | 71.5312165 | 64.9198698 | 63.6971642 | 68.3645556 | 55.9103156 |
| 12.0029883 | 6.96817566 | 6.76257694 | 6.82028312 | 7.2606349  | 7.32547024 | 7.51347529 |
| 88.4574391 | 40.843978  | 41.6972076 | 86.8714618 | 58.98878   | 79.184845  | 83.7551241 |
| 55.8138955 | 26.4986962 | 26.4510921 | 100.94019  | 105.837717 | 82.2994156 | 89.3566883 |
| 10.1481857 | 8.59621869 | 9.55965077 | 17.1248318 | 14.9474857 | 11.5667344 | 11.2293726 |
| 16.1419446 | 4.28605052 | 4.52692606 | 26.4652954 | 19.4047379 | 10.5583572 | 14.0380241 |
| 1.12590014 | 0.92060056 | 1.60592632 | 5.28863166 | 4.36576638 | 2.38395932 | 2.85266639 |
| 62.2920676 | 62.7340192 | 67.3854114 | 147.655699 | 177.928258 | 126.595604 | 143.21253  |
| 178.807016 | 174.792455 | 171.478518 | 173.720583 | 200.360611 | 191.38786  | 172.355586 |
| 71.2451037 | 49.0461809 | 57.6941446 | 78.0051186 | 94.9972761 | 53.5284887 | 59.2572677 |
| 9.103188   | 7.08395764 | 5.10418147 | 100.740296 | 115.096892 | 128.316982 | 142.878452 |
| 15.8971685 | 3.68682944 | 3.21571412 | 39.9423562 | 25.8226127 | 27.2162904 | 27.6563146 |
| 30.5771322 | 30.4958004 | 28.4834864 | 107.62117  | 83.5226218 | 73.7708389 | 68.9488835 |
| 93.0667746 | 86.2645539 | 81.6809604 | 102.973586 | 109.459916 | 71.0295952 | 63.0376833 |
| 23.4756395 | 18.8172786 | 16.8265109 | 31.6966742 | 34.1951062 | 22.6822294 | 20.6565549 |
| 38.6723994 | 18.8687889 | 14.1065763 | 115.178713 | 101.871253 | 58.7481595 | 54.4246891 |
| 68.5958123 | 65.8959082 | 56.8607988 | 233.781566 | 248.661777 | 143.051607 | 141.63033  |
| 17.0885749 | 4.5410948  | 5.17953203 | 69.5882755 | 67.5875397 | 71.301834  | 73.8594443 |
| 11.8464276 | 3.11345964 | 2.71561143 | 25.3867035 | 32.4829288 | 14.2279779 | 15.8903002 |
| 34.0292445 | 10.6707482 | 12.1594124 | 58.2071648 | 77.048544  | 22.8087309 | 24.3128413 |
| 27.3003134 | 12.2116126 | 9.9639998  | 66.4298256 | 71.3614963 | 36.6032668 | 31.5932885 |
| 210.131664 | 138.681507 | 147.675487 | 197.872331 | 204.966989 | 96.1210257 | 85.5536462 |
| 10.3851785 | 4.09197553 | 2.93925001 | 25.1281173 | 26.0260472 | 8.61649531 | 8.62870645 |
| 29.9137966 | 9.5479429  | 6.78567596 | 136.307508 | 128.123463 | 64.3713536 | 43.8314454 |
| 20.0635405 | 8.91141338 | 7.2073973  | 52.3949857 | 51.9421421 | 18.8809578 | 19.7136028 |
| 69.0591017 | 38.2710077 | 38.7021578 | 157.518542 | 173.426356 | 64.9156139 | 61.2498179 |
| 75.7607649 | 44.4304843 | 39.4982596 | 97.9942929 | 106.161795 | 42.7337856 | 41.8775621 |
| 10.7240967 | 2.6184685  | 2.87598683 | 57.5999383 | 59.9262725 | 15.5483526 | 17.5446592 |
| 37.6771926 | 22.870307  | 18.0350544 | 137.886943 | 120.343715 | 86.8558768 | 72.2387946 |
| 108.906996 | 46.9421805 | 40.5322577 | 199.991563 | 253.712866 | 79.2314243 | 79.9749463 |

|            |            |            |            |            |            |            |
|------------|------------|------------|------------|------------|------------|------------|
| 77.4703319 | 26.5746327 | 29.7566162 | 146.852952 | 157.13381  | 30.6338982 | 37.747764  |
| 70.6857384 | 68.3131104 | 60.9483494 | 64.2635634 | 67.5125746 | 42.2990938 | 43.0112613 |
| 72.7967495 | 58.4173759 | 70.3101511 | 135.438328 | 139.363261 | 87.6257595 | 117.873277 |
| 13.6961733 | 3.01880079 | 2.80292249 | 35.2801089 | 42.8558385 | 17.2071695 | 20.1464928 |
| 5.63726553 | 2.15103082 | 2.68023564 | 16.087088  | 16.8313843 | 13.1064571 | 11.6224457 |
| 19.5818023 | 12.1291587 | 12.8729867 | 70.8129404 | 70.6021549 | 55.550809  | 50.1356836 |
| 26.1546127 | 11.2802701 | 11.0686947 | 76.0383869 | 64.1933446 | 59.0664531 | 61.6838659 |
| 122.330112 | 67.064882  | 55.7953343 | 245.057101 | 198.327706 | 142.497795 | 136.035143 |
| 46.4433808 | 9.72975263 | 12.5685436 | 90.9522459 | 109.220855 | 35.3642742 | 44.3376467 |
| 31.863072  | 21.2208853 | 20.6419586 | 40.2964665 | 42.6563517 | 21.4836683 | 26.9013924 |
| 55.4555921 | 41.4236402 | 35.6200736 | 71.1261395 | 60.9307605 | 42.8239854 | 36.5263613 |
| 60.6416371 | 36.8231975 | 34.0762098 | 179.751197 | 165.895407 | 144.334046 | 116.436931 |
| 76.3136049 | 21.0767868 | 17.899748  | 450.199814 | 446.629856 | 270.998045 | 235.816012 |
| 12.3647088 | 2.76060088 | 3.29494186 | 27.7330504 | 31.7643671 | 8.79763301 | 11.3880485 |
| 29.9434445 | 12.1128787 | 13.487304  | 75.6988308 | 83.9644616 | 31.602692  | 29.2428501 |
| 220.447006 | 134.93009  | 154.222549 | 518.860513 | 415.514506 | 195.86046  | 216.219642 |
| 60.9052876 | 16.2332019 | 14.3144614 | 74.5452091 | 76.813562  | 30.2981667 | 33.003475  |
| 22.5037959 | 7.24515541 | 8.02456556 | 44.5413973 | 36.4856874 | 15.5034772 | 18.3943782 |
| 18.844603  | 4.43762747 | 3.67704405 | 66.8851656 | 75.4097168 | 31.5454196 | 30.669862  |
| 24.9327623 | 7.67490147 | 9.48341751 | 88.2994971 | 119.957473 | 27.6443333 | 31.7679288 |
| 47.9857384 | 23.1067317 | 26.6553918 | 75.5109294 | 96.9716238 | 35.1033188 | 40.5330645 |
| 10.8265364 | 5.14545599 | 4.1984072  | 26.4527617 | 28.9667154 | 9.10213686 | 9.07641321 |
| 18.5574267 | 8.74573819 | 8.37849137 | 56.6586303 | 47.730173  | 21.8942315 | 19.9267887 |
| 122.049379 | 69.0532576 | 66.0322357 | 235.312878 | 239.347897 | 146.772825 | 143.849034 |
| 14.0438667 | 5.0332983  | 5.07383498 | 46.0256281 | 38.8562909 | 19.5448308 | 17.5970362 |
| 78.8940597 | 25.6988571 | 25.7863293 | 112.735513 | 84.0551813 | 52.619632  | 50.0483744 |
| 29.9155808 | 44.6200896 | 39.2482031 | 105.067667 | 88.7204004 | 50.8325424 | 46.9554251 |
| 51.6553602 | 16.9873818 | 17.7314339 | 159.981108 | 140.516557 | 80.8109623 | 70.557347  |
| 16.4669182 | 3.4773011  | 3.96735678 | 42.3576321 | 22.7700968 | 13.8842732 | 14.1491453 |
| 43.5777905 | 18.5042532 | 17.2925553 | 93.9944714 | 93.2059752 | 50.787097  | 49.8103825 |
| 10.5850813 | 4.73138351 | 3.52287088 | 78.2166162 | 72.5666506 | 30.7185114 | 29.6588453 |
| 92.9392399 | 50.9763053 | 42.9803042 | 271.854173 | 199.305375 | 139.124705 | 133.956578 |
| 28.2936723 | 9.36693925 | 8.99884127 | 44.150551  | 43.0045428 | 17.7321513 | 16.6407054 |
| 27.1730105 | 7.96236394 | 7.36581005 | 95.7986324 | 98.1758412 | 39.6945174 | 37.2733667 |
| 17.7414206 | 7.85468675 | 7.68421715 | 69.5339599 | 78.9282489 | 30.3972074 | 28.1508151 |
| 25.5035058 | 7.60215359 | 6.63072515 | 78.0705849 | 85.0219553 | 31.8454962 | 49.9427367 |
| 89.8669307 | 48.5988908 | 39.3428639 | 132.125415 | 157.603279 | 62.2823366 | 52.5140982 |
| 87.1163003 | 40.0378081 | 34.3673322 | 311.21114  | 279.683586 | 124.639492 | 104.256487 |
| 30.0515993 | 8.64931298 | 2.74330001 | 77.9566385 | 92.476177  | 42.220827  | 33.3228943 |
| 122.862669 | 87.3773328 | 77.8794102 | 96.3828793 | 103.565773 | 49.6768958 | 44.582853  |
| 31.4385962 | 5.47043944 | 6.5606867  | 100.953009 | 112.705659 | 36.1096267 | 42.0319215 |
| 33.0866713 | 23.2838024 | 23.3257867 | 58.8050513 | 65.8727226 | 30.0968467 | 34.4377708 |
| 259.90877  | 177.323202 | 173.245825 | 689.144425 | 730.382346 | 295.405427 | 287.242005 |

|            |            |            |            |            |            |            |
|------------|------------|------------|------------|------------|------------|------------|
| 4.20936986 | 1.5419364  | 1.92128949 | 25.0025847 | 26.3243842 | 14.7219127 | 14.0027543 |
| 36.2240473 | 23.7594764 | 20.5549286 | 77.0522471 | 85.6510368 | 55.023986  | 52.6385331 |
| 47.1273021 | 27.120122  | 23.9382512 | 70.8066176 | 71.5538205 | 54.9333166 | 55.835103  |
| 86.226956  | 53.3079831 | 49.4958611 | 856.903179 | 783.198719 | 711.965086 | 673.906815 |
| 44.5820429 | 16.4604808 | 16.1658751 | 82.6242692 | 68.2876414 | 41.4113559 | 46.3638285 |
| 503.788876 | 81.0848146 | 87.3933688 | 224.659895 | 242.086843 | 86.5635633 | 99.975352  |
| 1804.24957 | 1753.18375 | 1809.77832 | 2124.57605 | 2107.23125 | 3712.4654  | 3826.10827 |
| 14.9476291 | 53.8031158 | 67.518821  | 50.8700014 | 40.8389822 | 142.439135 | 173.731981 |
| 78.3964267 | 72.1824484 | 87.7606613 | 108.092807 | 90.5913986 | 120.504937 | 131.903938 |
| 311.884519 | 218.273226 | 214.732677 | 70.5510806 | 63.2762968 | 111.014248 | 105.74377  |
| 66.227445  | 71.655921  | 65.5719093 | 56.7746475 | 66.1164739 | 89.9478336 | 85.9200214 |
| 36.3558471 | 112.679412 | 123.864853 | 127.824757 | 131.72592  | 203.51087  | 221.566522 |
| 257.505172 | 155.99165  | 171.183663 | 702.240988 | 806.490035 | 575.226127 | 695.970485 |
| 41.1861234 | 47.8293418 | 49.6361586 | 6.05261525 | 6.30058918 | 15.6845583 | 20.2818493 |
| 248.459398 | 279.942556 | 306.049408 | 120.049282 | 102.620559 | 169.612269 | 195.719873 |
| 181.85901  | 262.742029 | 276.920772 | 161.716973 | 194.18617  | 265.51347  | 298.136599 |
| 21.0838205 | 13.1852545 | 13.0866608 | 12.2171221 | 16.5305141 | 21.6430881 | 25.1386231 |
| 213.45098  | 121.984819 | 115.444963 | 34.4315763 | 37.6111202 | 64.5057571 | 60.793146  |
| 560.328646 | 490.920566 | 513.142321 | 116.363253 | 118.773393 | 114.399356 | 141.768622 |
| 0          | 0          | 0.05266046 | 0          | 0          | 0          | 0          |
| 1894.77757 | 1257.61423 | 1166.02004 | 0          | 0.57511931 | 0.61578076 | 1.28948505 |
| 435.649119 | 472.843511 | 430.487079 | 368.302484 | 327.264372 | 377.924279 | 371.099627 |
| 8.13559911 | 32.3702202 | 35.1963672 | 3.14494159 | 2.92114934 | 0.38298089 | 0.51556303 |
| 0.25448428 | 2.99636564 | 1.19784504 | 0          | 0          | 0          | 0          |
| 2.20126616 | 1.79988152 | 1.56988668 | 0.33354491 | 0          | 0          | 0          |
| 65.0849856 | 66.5742882 | 73.267768  | 31.8487735 | 26.5955923 | 22.6429532 | 25.7207807 |
| 80.5248803 | 33.1693407 | 40.958285  | 0          | 0          | 1.41927165 | 1.01898765 |
| 191.688107 | 24.4207001 | 34.3791764 | 56.3705144 | 49.9813085 | 17.2944922 | 17.5710051 |
| 3.38937181 | 8.03690011 | 7.61422161 | 3.20982226 | 3.02278785 | 1.89968579 | 3.28348291 |
| 61.4457099 | 80.2716231 | 81.1323908 | 31.6025201 | 15.6843533 | 32.27453   | 27.0025892 |
| 21.2795817 | 28.3449672 | 25.2596308 | 16.3815722 | 12.9946215 | 22.3384299 | 19.7019567 |
| 0.23638042 | 0.23193384 | 0.10114828 | 2.25649205 | 3.07972119 | 3.26801868 | 3.48777845 |
| 0.80216242 | 14.364079  | 14.2448343 | 0.54696127 | 0.37325375 | 0.44959852 | 1.07598696 |
| 152.445099 | 91.5845716 | 109.530893 | 10.2635159 | 8.52656195 | 8.40597441 | 10.2415466 |
| 553.099954 | 266.86415  | 254.975995 | 296.457576 | 217.388924 | 333.565906 | 296.827397 |
| 933.678763 | 908.155567 | 920.379747 | 1082.39672 | 845.891417 | 993.648985 | 947.545512 |
| 38.9577059 | 52.1248183 | 58.1940938 | 62.7867936 | 66.9065425 | 90.7812391 | 109.263026 |
| 14.2432362 | 32.8031456 | 31.8281226 | 6.1148823  | 6.25931717 | 10.6441252 | 12.9137532 |
| 237.517771 | 283.438933 | 280.640668 | 68.818085  | 52.0237065 | 32.9813467 | 41.8576299 |
| 487.172487 | 773.154225 | 724.025456 | 176.866856 | 143.009933 | 237.622408 | 210.514698 |
| 388.660334 | 623.99402  | 573.967065 | 96.6339757 | 74.6036839 | 89.0606631 | 75.2075944 |
| 84.0997085 | 130.15073  | 141.341253 | 18.1880023 | 14.9750316 | 22.4256248 | 27.9528093 |
| 12.2188006 | 18.8237734 | 18.8127605 | 3.06266729 | 3.71950121 | 4.94964544 | 5.71855454 |

|            |            |            |            |            |            |            |
|------------|------------|------------|------------|------------|------------|------------|
| 135.227262 | 189.312661 | 174.885376 | 69.8598577 | 51.2123752 | 57.6750982 | 56.7119336 |
| 25.4212132 | 43.7159088 | 42.4808868 | 266.269509 | 234.125856 | 487.670412 | 385.018992 |
| 1.21637426 | 5.96746432 | 4.75878574 | 0          | 0          | 0.12985853 | 0.93233904 |
| 8.68258651 | 16.1257367 | 18.5765953 | 17.1970489 | 17.0260914 | 14.1358595 | 15.8059056 |
| 34.2017828 | 85.3958372 | 74.156632  | 15.0260498 | 15.0253391 | 27.7726049 | 22.0413842 |
| 2.12533412 | 6.88166868 | 5.45664199 | 0          | 0          | 0.15882853 | 0.0950278  |
| 770.245607 | 2072.87867 | 2104.88698 | 148.824729 | 174.787452 | 383.404378 | 454.907262 |
| 1288.52318 | 3719.89377 | 3752.48741 | 125.583422 | 146.481028 | 487.750703 | 517.637609 |
| 306.307522 | 696.299581 | 742.32663  | 172.855183 | 217.660284 | 346.957518 | 381.715976 |
| 142.048779 | 318.665412 | 330.920007 | 22.6566478 | 24.6132359 | 24.1506212 | 27.1735386 |
| 29.4505673 | 99.6636746 | 107.760254 | 5.46425036 | 5.3136513  | 22.008729  | 17.4676462 |
| 6.44270458 | 32.2971689 | 26.1150131 | 0.53248642 | 0.59957025 | 1.57572103 | 1.67601906 |
| 66.523313  | 119.55352  | 116.200577 | 11.9220008 | 14.1104137 | 7.55401644 | 4.76390351 |
| 231.597659 | 479.87961  | 452.953123 | 55.7353537 | 68.462202  | 61.5944973 | 54.8215358 |
| 375.943213 | 707.130855 | 694.201492 | 111.09252  | 79.3596348 | 185.354711 | 231.09672  |
| 153.623437 | 169.964157 | 139.858968 | 74.1565825 | 60.6192511 | 90.6804486 | 65.7239851 |
| 35.4144374 | 39.2874372 | 46.2811416 | 47.8601788 | 53.741255  | 42.201893  | 55.4920048 |
| 40.3192291 | 65.1155665 | 65.3676956 | 14.7990114 | 15.6146771 | 64.0049771 | 51.9550503 |
| 75.079189  | 68.1280014 | 74.8818598 | 67.2314119 | 50.4325613 | 81.4191451 | 111.056518 |
| 49.9572214 | 93.5980114 | 71.5021347 | 41.8945054 | 32.0628507 | 75.310831  | 55.0718625 |
| 606.579974 | 1448.30629 | 1237.38657 | 286.382762 | 258.1531   | 397.101504 | 382.289945 |
| 153.76613  | 487.589675 | 535.970793 | 3.13560358 | 5.34944538 | 3.22180653 | 4.88330605 |
| 6.4952601  | 54.6613895 | 47.8903718 | 0          | 0          | 0          | 0.22339664 |
| 197.110096 | 604.67799  | 549.672539 | 2.92574035 | 2.99484698 | 3.2065854  | 3.83702788 |
| 19.4853799 | 86.1151004 | 67.6139373 | 2.902883   | 2.97144974 | 6.85253466 | 5.78378917 |
| 614.363331 | 1583.00996 | 1315.36237 | 480.65649  | 516.294157 | 1040.50074 | 846.457299 |
| 136.328393 | 229.547909 | 231.852199 | 12.0371578 | 9.79689393 | 27.2929847 | 26.7934327 |

| H460 P     | H460 P     | H460 C     | H460 C     | PU-8988T V | PU-8988T V | PU-8988T T |
|------------|------------|------------|------------|------------|------------|------------|
| 757.375353 | 698.055373 | 993.766432 | 921.403965 | 424.921165 | 416.75522  | 514.208765 |
| 730.285465 | 796.527869 | 482.178228 | 555.029983 | 17.9774339 | 26.0601279 | 955.590677 |
| 2234.48189 | 2016.96825 | 5016.7397  | 4462.37951 | 24.9533536 | 25.1755693 | 408.248058 |
| 148.201943 | 118.678193 | 253.372796 | 221.503284 | 443.984044 | 410.174875 | 625.169604 |
| 146.729818 | 153.917923 | 265.845474 | 280.372515 | 75.3596587 | 75.7681836 | 444.378784 |
| 4.76991008 | 5.3361228  | 18.6440235 | 18.8512106 | 61.8954044 | 63.8096415 | 218.106617 |
| 298.169106 | 308.687972 | 211.263195 | 238.356758 | 15.5434345 | 9.69480384 | 238.517571 |
| 71.6188486 | 62.4662852 | 184.425719 | 181.012137 | 71.1954005 | 70.2189366 | 164.929407 |
| 6.40316785 | 6.09239455 | 5.05765078 | 4.12065029 | 3.6597954  | 3.43280721 | 3.00362802 |
| 1492.35059 | 1422.84248 | 2261.82189 | 2159.60655 | 909.451249 | 864.549224 | 3009.89967 |
| 59.792401  | 58.878958  | 73.7381605 | 70.6538737 | 232.431195 | 243.255747 | 568.844721 |
| 91.3399081 | 86.3176933 | 34.7249581 | 32.8625859 | 55.3162821 | 55.869927  | 13.0246463 |
| 55.2008918 | 69.0412024 | 71.4727073 | 68.4469684 | 60.2142714 | 63.4387563 | 104.156865 |
| 12.144891  | 12.4983839 | 6.93177082 | 9.65202038 | 20.198686  | 20.9335056 | 17.1003174 |
| 74.816923  | 56.0192645 | 164.307272 | 150.631843 | 4.63703652 | 5.34014306 | 12.0150087 |
| 123.686127 | 113.045084 | 66.1899579 | 65.3120046 | 143.351839 | 141.757183 | 87.6513412 |
| 14.871531  | 16.3390112 | 8.57651026 | 8.45405258 | 25.3352169 | 28.1496732 | 17.7595083 |
| 23.498702  | 30.4542266 | 3.17255824 | 3.87853899 | 10.3483044 | 10.4909485 | 11.5019584 |
| 3.14781945 | 5.07443328 | 1.42729367 | 1.00597274 | 7.97110411 | 7.00702814 | 7.69938258 |
| 105.759133 | 116.939405 | 123.706443 | 126.96388  | 3.22446644 | 2.320867   | 3.01258538 |
| 197.686274 | 179.417462 | 176.066869 | 171.439311 | 80.8650993 | 83.5430972 | 101.761482 |
| 61.9596568 | 64.2917889 | 35.7706279 | 39.2204918 | 43.3056622 | 47.3994963 | 50.703666  |
| 89.2662743 | 86.9346458 | 80.9128615 | 84.4766767 | 40.0024533 | 32.4383876 | 51.8251067 |
| 31.4005962 | 26.4133867 | 8.06108008 | 13.325795  | 64.2232838 | 74.0450257 | 31.9075544 |
| 83.2518358 | 80.8151932 | 54.7671213 | 47.8608565 | 121.19112  | 133.939651 | 97.3584488 |
| 85.414669  | 101.554792 | 48.8654456 | 52.2275312 | 108.441952 | 111.082618 | 78.9250662 |
| 19.9969522 | 17.883196  | 13.120671  | 13.9961908 | 52.203962  | 55.9334955 | 39.255054  |
| 95.7982976 | 97.5430101 | 23.6639977 | 24.4704169 | 135.342005 | 140.937977 | 59.0437657 |
| 140.859981 | 170.460181 | 77.7009643 | 85.8690551 | 174.150467 | 188.996449 | 80.6956379 |
| 67.9679871 | 49.1323177 | 24.6717906 | 30.1549968 | 124.938244 | 126.445885 | 44.5176844 |
| 24.5024367 | 21.1068819 | 7.50880582 | 7.48481208 | 35.8059864 | 36.7405925 | 13.6395895 |
| 42.1753766 | 37.6200475 | 13.3418267 | 17.1143163 | 47.3431478 | 45.3924501 | 19.020921  |
| 47.1430799 | 38.5599863 | 13.9112061 | 13.3440604 | 64.5431756 | 67.6358938 | 16.8649541 |
| 143.149777 | 124.789776 | 80.6108008 | 73.756726  | 109.368474 | 116.966041 | 54.7793413 |
| 21.5558962 | 18.8342411 | 4.42295405 | 4.20841993 | 36.6064252 | 37.9199964 | 11.4236337 |
| 107.385136 | 109.89606  | 17.9708104 | 22.4124339 | 176.177946 | 181.838717 | 51.0527843 |
| 53.7527645 | 53.2010584 | 10.3272626 | 10.7115977 | 56.2244894 | 55.7824622 | 20.9716516 |
| 138.100394 | 140.389508 | 34.6360545 | 39.2947144 | 292.583536 | 294.861803 | 119.651539 |
| 98.5450174 | 92.2092332 | 19.0528837 | 22.8230065 | 141.387459 | 139.058446 | 69.2858501 |
| 50.0566912 | 52.3965122 | 5.34605184 | 5.98752055 | 48.864833  | 42.3579492 | 24.0429813 |
| 152.014384 | 127.73054  | 58.8268006 | 55.4599059 | 111.219321 | 109.801557 | 50.8442821 |
| 200.685393 | 197.951687 | 40.2295314 | 40.7269839 | 281.704879 | 252.82412  | 101.930767 |

|            |            |            |            |            |            |            |
|------------|------------|------------|------------|------------|------------|------------|
| 108.759645 | 107.165136 | 16.2907465 | 17.528069  | 185.370726 | 175.444116 | 51.3685076 |
| 58.7992557 | 55.5058946 | 34.1362616 | 32.1955754 | 129.726071 | 130.150563 | 97.86998   |
| 112.355185 | 111.035119 | 87.0104369 | 86.9713348 | 134.905905 | 130.496414 | 130.549455 |
| 35.279471  | 30.5404212 | 8.97482813 | 13.8334687 | 54.482364  | 52.4872999 | 19.6822245 |
| 13.8845199 | 14.7478357 | 4.63186873 | 4.19733453 | 31.1608854 | 31.8878781 | 13.6148852 |
| 62.655714  | 53.5039751 | 46.0416819 | 42.7528182 | 59.0522133 | 60.2765019 | 19.6641619 |
| 74.1568581 | 67.0020108 | 39.8357462 | 40.3687947 | 128.47526  | 130.784107 | 66.5446637 |
| 284.754632 | 267.036686 | 84.7219978 | 75.1632462 | 226.777333 | 224.636898 | 85.6063426 |
| 69.0849139 | 72.101407  | 15.0637345 | 19.5145117 | 100.488113 | 92.3256334 | 47.2107411 |
| 29.8604127 | 30.0437483 | 13.2385218 | 14.6957896 | 68.4019436 | 70.0244328 | 49.647652  |
| 50.5381894 | 47.2075013 | 22.4256281 | 24.4866152 | 177.971275 | 196.305725 | 100.661668 |
| 155.559486 | 138.487529 | 81.4196716 | 77.7771259 | 169.737346 | 176.264741 | 88.5275033 |
| 473.680587 | 521.848358 | 92.6813045 | 93.9436617 | 432.595102 | 451.374186 | 133.641565 |
| 20.8186221 | 26.0975745 | 2.50293527 | 3.01660608 | 30.2415425 | 26.6185592 | 12.4409589 |
| 61.4761162 | 63.191336  | 17.3146499 | 15.2075149 | 85.6552433 | 90.0970943 | 38.3615446 |
| 388.805753 | 358.593385 | 111.783489 | 115.928367 | 515.66387  | 513.2277   | 229.715825 |
| 65.0624034 | 64.2525439 | 14.4430945 | 12.6704236 | 157.547029 | 155.195989 | 54.8815865 |
| 30.4284485 | 31.3126701 | 6.04235995 | 6.84886551 | 46.6857954 | 42.4431286 | 25.3049108 |
| 52.5055687 | 57.1450289 | 9.30083731 | 10.0215813 | 54.2363938 | 51.4501108 | 27.6880784 |
| 64.4356275 | 69.9000882 | 6.19745935 | 10.3085733 | 74.8670624 | 67.2185839 | 27.0636192 |
| 64.2227051 | 63.7540323 | 25.5736714 | 24.7065409 | 237.554174 | 216.928614 | 78.2951155 |
| 23.7828629 | 25.3966463 | 3.00227915 | 2.17649864 | 58.8135917 | 64.6366781 | 33.8782849 |
| 41.9035076 | 38.9691552 | 7.47122152 | 9.32177428 | 69.6142361 | 71.0589592 | 29.3348482 |
| 180.980067 | 160.684314 | 84.9680659 | 87.4899326 | 229.963056 | 231.668773 | 121.059514 |
| 39.3985413 | 35.2877257 | 8.8838752  | 11.5861979 | 50.4509574 | 55.683543  | 21.6886311 |
| 109.457756 | 95.309953  | 21.6852956 | 22.564573  | 117.868024 | 125.557497 | 43.927799  |
| 76.5004721 | 77.6679348 | 22.147614  | 23.0877147 | 127.816928 | 138.217381 | 54.73228   |
| 173.212513 | 169.116425 | 23.7465984 | 24.9531538 | 263.940119 | 264.213847 | 83.7353685 |
| 33.056299  | 29.7755833 | 4.12961301 | 5.35422096 | 30.669994  | 31.2263499 | 18.2900197 |
| 97.2750022 | 94.8372166 | 25.8996878 | 24.9142378 | 84.0278703 | 85.7455677 | 40.2031538 |
| 49.5112854 | 44.9103584 | 12.275547  | 12.9884252 | 51.9967252 | 56.0713248 | 23.0369008 |
| 207.274002 | 195.398305 | 63.9096947 | 72.4146919 | 501.36582  | 548.161856 | 213.168499 |
| 36.8029081 | 37.478575  | 6.7818192  | 7.34291991 | 75.0917362 | 79.4171413 | 30.4114069 |
| 71.5020938 | 63.5179062 | 13.7164467 | 12.9193048 | 112.895936 | 113.606687 | 49.608206  |
| 49.1698301 | 51.4464778 | 8.31970915 | 8.46710586 | 196.042809 | 198.218317 | 63.8321496 |
| 57.5068465 | 62.3137753 | 17.7340675 | 16.2681525 | 37.9753512 | 37.2856069 | 16.0842552 |
| 82.6845952 | 113.391908 | 27.0709342 | 25.1218696 | 131.608384 | 135.217645 | 53.6027407 |
| 216.786912 | 227.094131 | 25.7274773 | 27.0837833 | 274.289161 | 293.605661 | 165.465257 |
| 61.133828  | 63.1442715 | 10.497605  | 16.7547719 | 118.097137 | 132.918819 | 39.1439198 |
| 54.1071348 | 52.0469215 | 13.8510725 | 14.0086923 | 383.937262 | 392.734473 | 182.727243 |
| 64.3916774 | 65.997006  | 10.7979985 | 15.8576221 | 87.4454772 | 84.122313  | 38.2776807 |
| 42.7860548 | 44.5088978 | 20.0550388 | 18.4643726 | 83.3891171 | 76.5408693 | 58.1548255 |
| 374.934807 | 395.994447 | 109.55817  | 106.12698  | 915.629232 | 869.539602 | 482.24086  |

|            |            |            |            |            |            |            |
|------------|------------|------------|------------|------------|------------|------------|
| 17.3055348 | 20.2015203 | 6.26111905 | 6.07777729 | 9.46306954 | 10.1376185 | 6.96333888 |
| 66.835927  | 63.8850617 | 50.5795475 | 55.9361547 | 97.1365339 | 96.5072363 | 42.0231474 |
| 66.92555   | 56.9250648 | 46.2706108 | 46.5491615 | 90.09959   | 95.7796142 | 32.5708393 |
| 985.581421 | 829.219184 | 559.283678 | 564.100163 | 63.2227717 | 74.2701939 | 23.2849252 |
| 65.5269096 | 60.7874985 | 26.402165  | 28.3259034 | 56.0257124 | 53.6844892 | 28.4546186 |
| 177.691631 | 171.530589 | 73.5422522 | 74.6401134 | 713.303324 | 651.676778 | 133.539714 |
| 2754.66224 | 3624.54386 | 3441.62007 | 3846.88127 | 1028.12979 | 952.341544 | 1069.05727 |
| 71.1946681 | 70.7355678 | 172.972751 | 187.176329 | 0.23507136 | 0.06941407 | 4.41201662 |
| 139.493371 | 149.671284 | 189.972787 | 178.467612 | 112.422    | 110.668677 | 178.218708 |
| 107.151904 | 96.8274773 | 125.23276  | 113.710574 | 118.332476 | 119.374371 | 159.562792 |
| 50.8653195 | 50.0390717 | 77.6881949 | 74.2491597 | 57.1107966 | 53.1632806 | 91.372007  |
| 158.282008 | 162.838275 | 310.238405 | 290.872098 | 15.3702513 | 13.9900803 | 41.3238995 |
| 1002.76304 | 911.35946  | 1095.272   | 1018.82932 | 727.785281 | 654.487686 | 1119.58423 |
| 3.24490846 | 4.41924693 | 15.0673663 | 14.3970197 | 2.13851624 | 2.44971096 | 283.08122  |
| 94.7755358 | 108.813462 | 216.350032 | 250.828583 | 54.9146752 | 56.2432217 | 191.45227  |
| 369.509035 | 358.64932  | 356.058796 | 378.731491 | 11.316778  | 10.601331  | 82.5110619 |
| 17.0886726 | 19.444257  | 24.541252  | 30.5548822 | 23.6709674 | 20.3210467 | 28.8963789 |
| 60.5056309 | 58.900691  | 86.7471143 | 82.7905683 | 0          | 0.11621288 | 45.4961551 |
| 114.149663 | 112.230037 | 127.222151 | 124.75494  | 143.051752 | 140.828914 | 943.8212   |
| 0          | 0          | 0          | 0          | 0          | 0.05343483 | 0.36067568 |
| 0.49366005 | 0.19209044 | 2.08914356 | 2.20867805 | 0          | 0          | 21.9355897 |
| 373.830492 | 345.928289 | 474.077945 | 452.647936 | 332.252329 | 369.734713 | 588.810585 |
| 3.2238013  | 2.9867354  | 1.02863578 | 0.89288753 | 338.890328 | 315.862444 | 85.6110658 |
| 0          | 0          | 0          | 0          | 0          | 0          | 19.3915956 |
| 0          | 0          | 0.31005841 | 0.39335882 | 0          | 0          | 6.09295843 |
| 34.5129494 | 31.8067109 | 28.8270395 | 27.4123185 | 31.3282371 | 31.5953626 | 38.1856296 |
| 0.30341436 | 0          | 4.49411798 | 3.25800539 | 7.6950673  | 7.25660847 | 12.9873414 |
| 64.8762129 | 69.2182311 | 56.0914213 | 59.456858  | 848.649023 | 880.080855 | 1470.8077  |
| 2.48183297 | 3.68728688 | 1.43222558 | 2.27125981 | 2.58417847 | 2.69803411 | 8.82969967 |
| 33.9375733 | 37.3249552 | 32.3446326 | 28.2346473 | 67.4617107 | 88.1187127 | 100.846037 |
| 23.9445323 | 24.2870227 | 28.2302219 | 26.6704201 | 30.3813169 | 32.7830865 | 33.9802538 |
| 2.54910175 | 3.636942   | 5.89326171 | 5.7024516  | 3.93920141 | 5.0291475  | 17.0883925 |
| 0          | 0.18700071 | 0.33896474 | 0.43003113 | 0          | 0          | 20.9625486 |
| 9.27928064 | 8.61992402 | 14.0001053 | 14.2968137 | 11.5743996 | 11.579464  | 37.6411568 |
| 348.667059 | 332.020254 | 389.893735 | 355.89192  | 490.228497 | 518.403187 | 763.537519 |
| 1160.24732 | 1082.44598 | 1034.58285 | 1048.70205 | 877.520155 | 899.361781 | 1306.48937 |
| 61.6735688 | 69.3523066 | 182.280491 | 206.569964 | 10.1838001 | 10.1491907 | 334.222592 |
| 25.9156393 | 25.4563535 | 62.5273453 | 56.6311039 | 2.58560797 | 2.74860889 | 70.5386319 |
| 65.8075553 | 66.843451  | 63.7462232 | 67.6803712 | 115.367527 | 120.782293 | 611.183122 |
| 201.107889 | 195.889223 | 264.580282 | 242.763756 | 269.764237 | 257.667653 | 463.949395 |
| 98.6282634 | 101.116947 | 104.649872 | 91.3240023 | 150.38616  | 167.512007 | 366.403542 |
| 17.8479317 | 16.37373   | 23.3853657 | 26.1125795 | 39.2220015 | 37.766866  | 237.818838 |
| 3.14706557 | 2.76859273 | 6.6591086  | 5.38722434 | 4.328419   | 4.2641261  | 77.3100619 |

|            |            |            |            |            |            |            |
|------------|------------|------------|------------|------------|------------|------------|
| 71.5669268 | 75.7208537 | 60.4033493 | 64.3991041 | 13.5958825 | 12.238418  | 50.8099649 |
| 245.033513 | 237.92183  | 433.37707  | 406.402931 | 15.6222186 | 16.9246477 | 25.6186789 |
| 0          | 0          | 0.1468559  | 0.37262052 | 0          | 0          | 44.9855507 |
| 28.7336617 | 19.3734433 | 13.6275141 | 15.6263134 | 28.3710641 | 30.6981867 | 93.3038987 |
| 13.4313691 | 15.5008635 | 26.4019301 | 24.0713898 | 16.5450504 | 17.7540024 | 40.6921085 |
| 0          | 0          | 0          | 0.34181102 | 0.20834111 | 0          | 4.15255312 |
| 193.546166 | 192.828233 | 291.80773  | 300.173994 | 179.242986 | 172.043915 | 1666.44077 |
| 167.139001 | 160.94577  | 302.745478 | 332.870368 | 68.9902358 | 68.1076903 | 1930.85572 |
| 256.477713 | 257.573951 | 305.372842 | 353.282547 | 107.523643 | 102.503303 | 534.565965 |
| 22.4113635 | 21.9639023 | 23.9826886 | 21.2033093 | 16.9166097 | 14.4506734 | 169.005645 |
| 6.48146606 | 3.64293874 | 19.8099965 | 25.1321578 | 34.7614079 | 37.5791425 | 100.991313 |
| 0.46786163 | 0.76461796 | 2.72245324 | 2.3863092  | 1.186571   | 1.3224086  | 148.995962 |
| 11.1297902 | 10.4447894 | 12.2369443 | 11.2772503 | 25.9773233 | 26.2152477 | 93.6785172 |
| 84.8831999 | 80.6677409 | 111.105297 | 93.4830347 | 120.191987 | 139.599555 | 111.795035 |
| 103.840282 | 100.367989 | 371.771867 | 352.902916 | 106.701396 | 101.14601  | 318.500032 |
| 68.1496885 | 65.3096666 | 77.7039609 | 85.9097882 | 100.772156 | 105.372952 | 140.504036 |
| 35.807631  | 42.6923632 | 54.6015037 | 62.9423243 | 14.2825069 | 16.4850822 | 21.9737648 |
| 41.009276  | 38.7646045 | 82.5416522 | 89.4124844 | 48.6070534 | 53.7155566 | 221.163147 |
| 73.0507777 | 92.6449019 | 100.663632 | 119.234447 | 26.561765  | 29.9029855 | 78.3094661 |
| 43.3463694 | 40.7612275 | 72.4295137 | 66.492148  | 32.3664172 | 33.4718799 | 81.4102788 |
| 491.188026 | 451.235804 | 577.759005 | 580.303341 | 191.759295 | 205.561121 | 626.302717 |
| 2.06629016 | 3.21609652 | 3.88641426 | 4.31422233 | 9.39146638 | 11.2314596 | 605.921452 |
| 0          | 0          | 0.42225558 | 0          | 0          | 0          | 17.0835934 |
| 1.49955179 | 2.00056398 | 2.03979371 | 1.72520364 | 22.0825172 | 20.0279623 | 233.16831  |
| 2.81217455 | 3.20643277 | 6.15806311 | 4.74016289 | 1.39111096 | 1.06644869 | 171.080572 |
| 448.687379 | 571.883376 | 544.793416 | 560.336084 | 317.475044 | 334.219422 | 1390.10444 |
| 14.6515407 | 13.1012761 | 30.249463  | 31.4303595 | 24.1849891 | 23.9094119 | 72.9789407 |



| PU-8988T T | PU-8988T P | PU-8988T P | PU-8988T C | PU-8988T C | PANC-1 V   | PANC-1 V   |
|------------|------------|------------|------------|------------|------------|------------|
| 475.361337 | 1074.66873 | 1132.04125 | 1016.10883 | 957.412731 | 1028.506   | 1057.17653 |
| 975.770561 | 725.691164 | 698.358836 | 1334.63225 | 1237.48806 | 342.089625 | 341.082499 |
| 428.594993 | 107.224985 | 93.6990956 | 451.814334 | 428.931137 | 409.079184 | 404.583034 |
| 639.448565 | 599.594809 | 681.120879 | 965.68139  | 935.367043 | 209.169864 | 194.530698 |
| 417.612947 | 594.335174 | 598.761472 | 653.602466 | 659.14243  | 243.777657 | 204.800673 |
| 215.898933 | 155.302769 | 166.249436 | 317.957003 | 313.044485 | 30.6689585 | 30.3020525 |
| 247.711809 | 130.093883 | 131.663294 | 395.177488 | 363.548716 | 59.1193321 | 58.6889868 |
| 200.397859 | 199.014394 | 196.18131  | 264.078333 | 252.144145 | 125.519754 | 126.075234 |
| 3.54030529 | 3.40770255 | 2.68555032 | 3.14526201 | 2.78674239 | 44.7197164 | 45.7431782 |
| 2935.24322 | 1593.72776 | 1932.427   | 3670.86036 | 3552.18358 | 363.670338 | 388.33805  |
| 602.589396 | 708.505828 | 792.298242 | 847.519052 | 833.418805 | 76.0770272 | 78.1276642 |
| 17.744763  | 123.248665 | 129.035611 | 26.6317172 | 24.6696936 | 79.4963498 | 81.2232119 |
| 103.670107 | 100.49667  | 124.96352  | 134.315603 | 154.803699 | 63.0194092 | 54.3545652 |
| 15.2953269 | 20.8117704 | 21.8833453 | 17.300599  | 16.9645185 | 9.81828758 | 10.0452983 |
| 15.2511762 | 21.6862763 | 18.9310952 | 15.8944662 | 15.8113646 | 133.042806 | 124.077884 |
| 86.5199516 | 86.5628551 | 85.1315507 | 83.4726353 | 78.383505  | 44.36263   | 41.4368556 |
| 20.8486452 | 16.1689615 | 16.36231   | 10.6169773 | 11.2074839 | 49.9308148 | 47.6104046 |
| 12.3860684 | 12.3959785 | 12.2615831 | 6.44780934 | 5.1542725  | 18.8547382 | 19.3009902 |
| 7.77864007 | 3.7058303  | 2.8370567  | 2.27402199 | 2.09075896 | 5.41305759 | 6.07513339 |
| 4.54510478 | 34.655079  | 33.276066  | 5.43569038 | 2.54508887 | 114.901541 | 117.901942 |
| 83.1203253 | 33.9267819 | 35.1085766 | 63.7741345 | 70.6377847 | 38.0122303 | 38.3570284 |
| 43.5764228 | 31.6087131 | 29.6368336 | 43.88628   | 45.996697  | 62.152504  | 72.0004921 |
| 50.3138212 | 49.5932313 | 41.5960655 | 38.5588198 | 29.9225825 | 23.7694343 | 19.7029037 |
| 31.4182243 | 28.7445209 | 25.9626449 | 14.8068744 | 14.312975  | 58.0171436 | 47.7428359 |
| 114.232491 | 75.6373598 | 75.9575225 | 62.4855454 | 66.4388867 | 60.4465042 | 59.2361006 |
| 79.164245  | 70.6685525 | 64.101569  | 62.390173  | 63.2454584 | 119.952727 | 127.69025  |
| 36.6688037 | 21.6347049 | 20.1135422 | 17.3107234 | 20.1507612 | 48.5122519 | 48.058009  |
| 57.134795  | 50.080445  | 52.9992358 | 28.8685563 | 30.3473554 | 66.5478613 | 63.7385128 |
| 88.3319946 | 77.5112135 | 71.5455663 | 63.8984192 | 53.352935  | 150.50726  | 146.406553 |
| 52.1439917 | 19.5856544 | 18.6804396 | 16.4727934 | 16.3071914 | 126.802524 | 135.251961 |
| 14.4202781 | 11.4886494 | 8.27794475 | 7.57418814 | 7.07092082 | 22.7988628 | 22.3630211 |
| 17.1276974 | 23.0113657 | 21.8398215 | 11.014855  | 9.33752691 | 69.4334988 | 64.2053854 |
| 18.8612919 | 18.6888049 | 17.1384061 | 9.95163846 | 8.94631239 | 71.256416  | 71.8851406 |
| 46.5948242 | 45.8689164 | 53.2105692 | 37.8928614 | 38.2872082 | 564.074863 | 521.351769 |
| 11.6757419 | 11.8810915 | 11.1995723 | 5.85567487 | 6.47892651 | 20.6728872 | 19.6122756 |
| 47.8077688 | 55.9235842 | 61.5410842 | 22.2348817 | 23.2011558 | 79.5621611 | 68.8180562 |
| 17.2651238 | 22.5949767 | 22.5429187 | 9.77829455 | 9.71041382 | 32.815158  | 32.8949876 |
| 106.141678 | 111.104615 | 95.7709183 | 55.4257475 | 54.3520214 | 114.636593 | 111.798094 |
| 62.212915  | 64.0124281 | 64.5378247 | 36.7751993 | 36.2942687 | 109.706044 | 110.787884 |
| 20.9411901 | 23.7022064 | 21.5361238 | 9.82723964 | 8.38174394 | 53.7170693 | 53.4189569 |
| 52.0609795 | 54.4992804 | 49.1261921 | 36.0556846 | 38.7378433 | 203.913685 | 194.086564 |
| 97.0005568 | 147.012935 | 115.457409 | 50.9849106 | 48.8106126 | 436.621205 | 444.761026 |

|            |            |            |            |            |            |            |
|------------|------------|------------|------------|------------|------------|------------|
| 47.8755559 | 82.0037033 | 75.2994202 | 27.0825837 | 24.014395  | 200.844231 | 194.665927 |
| 95.4678868 | 114.142224 | 109.184907 | 96.6089705 | 102.640224 | 147.136267 | 146.429078 |
| 116.155087 | 142.296609 | 121.621449 | 85.926785  | 86.2584369 | 107.184222 | 107.017085 |
| 18.6506024 | 19.4600443 | 18.9770668 | 10.0044819 | 9.70644238 | 44.0178986 | 42.6886342 |
| 14.352634  | 13.8608094 | 13.9263229 | 7.41801655 | 8.82043941 | 28.0750513 | 25.6066231 |
| 18.9956223 | 19.790915  | 18.0960191 | 11.4793677 | 13.2043516 | 33.1127788 | 33.1759549 |
| 71.4847176 | 65.0714985 | 59.8126756 | 49.7118477 | 50.8810158 | 108.242119 | 112.988692 |
| 73.6182237 | 103.83317  | 83.5436052 | 48.0762573 | 58.1467679 | 195.763738 | 196.156396 |
| 37.5792409 | 50.3747892 | 42.6438037 | 21.710764  | 16.4717902 | 68.8473262 | 72.6502852 |
| 50.6682184 | 58.1292178 | 53.4292235 | 41.2800359 | 38.4541202 | 70.3190602 | 65.5089932 |
| 105.409539 | 109.348951 | 107.706718 | 65.035569  | 68.578968  | 114.721834 | 108.935304 |
| 80.1034424 | 77.7948693 | 73.8757902 | 46.639096  | 46.1769752 | 179.147657 | 184.003777 |
| 136.430676 | 142.136825 | 139.257451 | 70.3720165 | 71.7306721 | 246.070448 | 240.154257 |
| 12.2767232 | 13.0552834 | 11.0623444 | 5.34271579 | 5.40794499 | 23.879478  | 24.9976646 |
| 40.7698722 | 36.4957258 | 32.0027975 | 17.4344121 | 17.8843199 | 45.9875074 | 45.7286774 |
| 234.33686  | 273.699545 | 226.861947 | 102.734005 | 104.831513 | 374.875093 | 381.006143 |
| 53.4248626 | 59.7551006 | 52.3872586 | 29.5430659 | 29.9346832 | 208.468936 | 216.3391   |
| 28.0178272 | 24.8001712 | 21.9941649 | 12.3959306 | 10.6648493 | 37.5200025 | 40.50115   |
| 26.9414676 | 24.7748923 | 20.1112336 | 12.497894  | 12.6910842 | 76.617677  | 82.8726874 |
| 27.7711097 | 31.9523376 | 27.9709197 | 13.3748399 | 12.7096137 | 64.1791576 | 64.1706356 |
| 74.6441    | 69.2968617 | 65.4213611 | 37.2423936 | 39.0287959 | 75.2780571 | 86.9159807 |
| 29.7636011 | 26.4875272 | 22.4164227 | 13.6977823 | 15.2878095 | 34.7009255 | 35.7660239 |
| 26.5842046 | 23.1886478 | 21.2472271 | 10.141634  | 9.85878436 | 36.4137952 | 36.879796  |
| 122.982614 | 122.52727  | 100.85032  | 84.3586703 | 80.178453  | 257.326941 | 251.18675  |
| 23.6659522 | 24.4665681 | 24.1196176 | 10.6542141 | 10.6710444 | 34.8210801 | 36.0600265 |
| 47.7963524 | 53.5920516 | 51.3526507 | 17.7897396 | 18.5408708 | 103.769621 | 101.391522 |
| 62.7476965 | 48.9947981 | 44.9847808 | 25.1557652 | 26.2404542 | 59.0207668 | 57.6415173 |
| 92.5528524 | 90.0814553 | 87.3354527 | 44.4002793 | 44.9745482 | 127.925775 | 116.826985 |
| 23.0171983 | 20.6910404 | 16.8255767 | 8.05508104 | 8.30937966 | 57.770415  | 58.9996073 |
| 42.1902772 | 47.1725169 | 40.253224  | 21.4072113 | 20.0117469 | 96.1745471 | 99.3267514 |
| 22.3724881 | 21.2773693 | 17.5724146 | 7.06157446 | 8.08085857 | 30.5814388 | 31.7823578 |
| 240.887344 | 257.520996 | 262.083366 | 118.287686 | 126.133598 | 310.491034 | 337.54185  |
| 30.2055601 | 30.2019883 | 22.6404107 | 14.022879  | 14.1306711 | 47.0060099 | 46.3463014 |
| 45.531722  | 42.4932978 | 39.2563939 | 22.147086  | 18.7224823 | 99.6558721 | 102.602974 |
| 58.9941287 | 63.5577361 | 56.9556381 | 23.4781635 | 23.8384152 | 86.2066673 | 84.9125925 |
| 23.7905958 | 21.1755459 | 14.9295462 | 8.3578391  | 4.79586415 | 54.0643023 | 46.072063  |
| 46.4460453 | 33.6792204 | 33.4989714 | 22.5454923 | 19.0929686 | 46.9370623 | 44.6789793 |
| 147.969212 | 119.004598 | 94.1814488 | 58.8686991 | 58.1337019 | 115.218346 | 112.549612 |
| 34.326681  | 37.5869288 | 33.1405526 | 22.7335316 | 23.3140121 | 57.9528845 | 57.1835605 |
| 178.213312 | 133.298324 | 120.989129 | 113.195407 | 114.359707 | 286.43894  | 275.258469 |
| 36.2362598 | 31.8408418 | 32.5738224 | 16.2085463 | 16.5842581 | 74.674914  | 79.3523925 |
| 62.955884  | 50.2112956 | 41.0027172 | 26.1429535 | 28.2023544 | 47.9174131 | 54.6517661 |
| 465.313387 | 327.44609  | 304.979944 | 332.767586 | 294.091382 | 702.312505 | 661.160099 |

|            |            |            |            |            |            |            |
|------------|------------|------------|------------|------------|------------|------------|
| 6.77282196 | 5.46278092 | 5.59041846 | 4.39003036 | 3.89095927 | 27.006006  | 25.1788977 |
| 43.7057655 | 42.8364223 | 41.5827525 | 36.2200439 | 37.0455094 | 43.8546318 | 45.5909127 |
| 30.8955574 | 37.6337705 | 36.6660253 | 19.4239685 | 20.1860302 | 79.6948948 | 79.7925723 |
| 20.9876515 | 25.9582924 | 23.0680104 | 12.3569497 | 6.94289766 | 60.3862321 | 60.4448871 |
| 29.082158  | 29.4875559 | 26.315079  | 15.8622956 | 16.5983556 | 82.5605002 | 81.036227  |
| 134.944708 | 323.459998 | 297.669851 | 152.307529 | 135.551462 | 663.107187 | 724.962981 |
| 1032.08519 | 1167.428   | 1246.35645 | 1275.15019 | 1185.03295 | 894.31166  | 970.254654 |
| 5.00705265 | 4.70756207 | 5.22502672 | 16.6875766 | 15.6350987 | 19.3912757 | 20.2010182 |
| 166.680699 | 186.059151 | 200.903667 | 174.78133  | 165.588109 | 147.965929 | 145.572594 |
| 165.776464 | 148.039831 | 148.217125 | 233.8809   | 205.862252 | 76.2465379 | 68.3629064 |
| 79.6312654 | 66.9009939 | 66.1249241 | 110.898785 | 102.455888 | 67.3754244 | 71.5969491 |
| 42.3785033 | 17.6213302 | 20.4570756 | 36.682985  | 34.449044  | 13.3577808 | 13.0918424 |
| 917.043123 | 936.169193 | 925.105457 | 1325.88424 | 1304.89125 | 288.286691 | 271.113106 |
| 276.491783 | 136.887998 | 104.065621 | 223.574283 | 220.71303  | 15.9133731 | 19.6076216 |
| 194.414994 | 164.607861 | 160.138445 | 232.355652 | 233.973636 | 240.696191 | 251.58857  |
| 81.8979676 | 11.3245258 | 11.8012022 | 45.0987289 | 47.3930253 | 61.0588063 | 66.850821  |
| 25.6113047 | 24.1306635 | 26.3747504 | 37.7766102 | 40.0602375 | 6.99288893 | 7.3478498  |
| 41.4208763 | 32.3750509 | 24.1603919 | 91.039063  | 82.0078636 | 0.1608497  | 0.26525882 |
| 902.02605  | 753.478478 | 791.953063 | 966.008182 | 922.348358 | 249.259503 | 240.003066 |
| 0.79355714 | 0.08679936 | 0.10944807 | 0.98294446 | 0.53323482 | 53.8420751 | 53.2586358 |
| 17.0785061 | 0          | 0.18320415 | 56.8494035 | 60.4402163 | 75.0222771 | 68.4611091 |
| 582.932996 | 382.658103 | 423.390824 | 602.156024 | 616.608469 | 248.136642 | 240.952952 |
| 88.0434764 | 226.94879  | 307.702105 | 342.702955 | 324.911151 | 337.884455 | 343.12875  |
| 18.4023444 | 17.8592375 | 21.1613339 | 57.4034797 | 58.7560548 | 0.61174966 | 0.75663179 |
| 5.06938302 | 2.07009448 | 4.56793393 | 23.4424313 | 20.8925751 | 0.88192994 | 1.69679925 |
| 35.8369551 | 34.1578042 | 36.4570193 | 59.1426955 | 58.9656905 | 26.2730687 | 23.9578576 |
| 10.4968266 | 13.9308124 | 21.9572554 | 41.6361591 | 41.3799282 | 185.810999 | 191.482849 |
| 1420.67221 | 6327.25982 | 6838.10576 | 3646.06627 | 3173.62467 | 920.015933 | 924.922369 |
| 7.02496672 | 4.28307127 | 5.52625752 | 11.2797462 | 13.8117242 | 2.43297673 | 1.86616089 |
| 127.112602 | 101.287465 | 115.538231 | 129.19727  | 131.707037 | 70.0558471 | 72.3801081 |
| 38.2031802 | 40.6914593 | 42.4601848 | 44.5374278 | 46.0625679 | 47.7533728 | 46.2117443 |
| 15.8955992 | 14.4213689 | 16.292348  | 53.7755564 | 55.0151356 | 18.0413077 | 18.2729423 |
| 20.6901139 | 1.98020078 | 2.675248   | 31.2616654 | 30.0400411 | 4.98144726 | 2.38498658 |
| 37.5657247 | 68.5455685 | 67.1879575 | 57.9943882 | 54.9916476 | 166.661987 | 170.608623 |
| 788.667828 | 908.09842  | 846.59587  | 740.224667 | 768.901852 | 181.320483 | 167.865178 |
| 1379.61901 | 1246.49575 | 1314.42638 | 1265.86722 | 1312.25359 | 697.231748 | 741.698765 |
| 335.705614 | 141.632402 | 167.249829 | 640.659387 | 593.213901 | 256.259494 | 279.393393 |
| 74.1674128 | 1.9533636  | 1.23152914 | 44.8948736 | 47.5106251 | 1.50588328 | 1.56844229 |
| 679.301306 | 674.62049  | 651.784724 | 1017.49685 | 1004.31139 | 379.892668 | 354.153857 |
| 489.432033 | 257.128506 | 293.689439 | 488.077887 | 540.369197 | 255.442188 | 249.510936 |
| 389.673086 | 303.4057   | 340.242507 | 473.321149 | 477.608436 | 119.869364 | 118.228319 |
| 237.019033 | 141.90645  | 144.800971 | 274.627628 | 264.288284 | 57.739821  | 61.707571  |
| 73.3196052 | 37.4924101 | 38.3382448 | 107.846398 | 101.786488 | 13.3365927 | 13.9204183 |

|            |            |            |            |            |            |            |
|------------|------------|------------|------------|------------|------------|------------|
| 52.856434  | 25.5600582 | 22.6800116 | 73.9337198 | 77.2653876 | 23.1232665 | 22.1702365 |
| 26.5808117 | 33.8149505 | 35.340248  | 42.1562583 | 39.2558018 | 20.655741  | 20.2731378 |
| 48.0211963 | 19.9772479 | 32.144227  | 122.518736 | 122.403625 | 0.41771682 | 0.34443046 |
| 93.4074208 | 61.2389863 | 69.7721458 | 163.636414 | 141.654471 | 4.72102405 | 5.73667484 |
| 38.1942501 | 25.4030546 | 30.7570557 | 87.8305112 | 82.4349406 | 12.8224807 | 12.6242861 |
| 2.83881934 | 1.64891691 | 1.32310931 | 9.42424245 | 8.81423965 | 2.59709946 | 2.31697994 |
| 1583.83841 | 663.305358 | 707.189391 | 2716.76562 | 2594.90915 | 237.908009 | 235.831627 |
| 1909.92989 | 545.321787 | 610.139395 | 3378.26804 | 3241.7287  | 327.598713 | 328.486943 |
| 550.621114 | 245.669682 | 262.294986 | 840.795891 | 810.002327 | 302.288333 | 300.462842 |
| 167.582263 | 54.9985911 | 58.1248671 | 310.636145 | 300.75181  | 42.4500196 | 43.4475584 |
| 102.980043 | 53.4130041 | 57.7287045 | 180.102541 | 175.971187 | 19.3845174 | 14.2958901 |
| 141.411619 | 89.7664671 | 106.886624 | 208.771056 | 214.697395 | 96.5621442 | 90.2820449 |
| 89.4657999 | 28.3250779 | 26.969218  | 152.894537 | 163.186811 | 24.2443287 | 23.4654762 |
| 95.3764987 | 116.745566 | 107.225723 | 141.080324 | 147.572736 | 115.986036 | 112.964006 |
| 328.587174 | 270.656953 | 297.810695 | 379.223545 | 339.88399  | 242.492584 | 242.549156 |
| 164.347634 | 155.514388 | 169.178307 | 186.548383 | 171.628014 | 232.684174 | 232.708683 |
| 22.3364166 | 34.3167449 | 31.0700505 | 44.8147424 | 46.8046015 | 18.2791053 | 17.601714  |
| 205.775534 | 225.027008 | 214.700892 | 229.404509 | 230.039854 | 28.1938375 | 26.3084089 |
| 86.8414253 | 96.7504691 | 83.8406958 | 102.924622 | 86.6567607 | 41.1624151 | 43.6380071 |
| 89.4600984 | 33.868349  | 43.4716994 | 93.7045625 | 99.966478  | 23.0347276 | 20.3449882 |
| 705.272752 | 249.347642 | 286.99883  | 774.705785 | 768.866357 | 289.085239 | 295.69277  |
| 568.435884 | 383.536683 | 383.414587 | 656.703008 | 692.052977 | 315.168807 | 306.493697 |
| 17.719704  | 1.23338912 | 1.55521956 | 26.1456929 | 26.9063808 | 3.10274741 | 4.45654277 |
| 227.275121 | 111.975268 | 109.23391  | 338.726318 | 328.013191 | 5.15732259 | 4.42968307 |
| 165.391465 | 111.908885 | 123.488991 | 220.97918  | 231.19053  | 94.7962795 | 91.4175844 |
| 1387.18144 | 610.894086 | 721.125708 | 1816.38401 | 1738.71538 | 495.722448 | 447.247872 |
| 71.4257017 | 43.8645105 | 45.8397323 | 79.6223094 | 80.5511802 | 50.6451224 | 49.3572192 |

| PANC-1 T   | PANC-1 T   | PANC-1 P   | PANC-1 P   | PANC-1 C   | PANC-1 C   | MiaPaca2 V |
|------------|------------|------------|------------|------------|------------|------------|
| 1546.95279 | 1607.28567 | 1819.08525 | 1458.29445 | 2089.58242 | 1981.30942 | 941.989975 |
| 1571.05303 | 1607.86619 | 614.025154 | 685.60769  | 1990.47625 | 1913.48422 | 57.9605131 |
| 600.696748 | 616.125099 | 397.131598 | 526.837815 | 884.707147 | 1009.70336 | 10.2813028 |
| 233.21061  | 242.337096 | 295.463183 | 297.029638 | 380.173324 | 374.334667 | 469.152078 |
| 386.42264  | 403.987636 | 345.033353 | 250.645139 | 472.273062 | 513.769008 | 167.707713 |
| 52.2339516 | 56.2716714 | 50.9410798 | 47.9523531 | 76.9600667 | 80.9826193 | 12.8204437 |
| 157.246851 | 172.34791  | 81.1463535 | 111.804556 | 246.607421 | 218.213696 | 20.0587587 |
| 236.406887 | 264.423898 | 154.42956  | 183.692135 | 171.890272 | 172.379186 | 5.17827901 |
| 38.8840647 | 37.6445211 | 34.651657  | 44.5203168 | 33.5145155 | 35.6169971 | 14.201451  |
| 585.549447 | 565.738193 | 685.177796 | 743.922452 | 833.045379 | 771.385022 | 177.778583 |
| 99.507127  | 108.936099 | 62.9685868 | 87.4259838 | 142.117193 | 138.073879 | 74.3263405 |
| 26.0399874 | 25.4151867 | 89.3005117 | 118.096386 | 44.5229334 | 42.8891943 | 56.0978222 |
| 80.5198484 | 92.667267  | 85.2999122 | 76.9568    | 116.343113 | 141.254574 | 97.708538  |
| 14.6506456 | 14.3899611 | 23.4856586 | 19.0428599 | 12.7993775 | 16.1495064 | 17.2994566 |
| 284.885036 | 295.859556 | 176.81961  | 227.921678 | 357.801858 | 411.137503 | 836.220139 |
| 18.3563972 | 23.2688732 | 44.5288088 | 40.2015931 | 26.4520469 | 22.6286497 | 133.879423 |
| 44.7871373 | 39.4059359 | 32.9131494 | 36.7220058 | 27.1273028 | 31.9746981 | 22.9631421 |
| 11.2320177 | 9.95848135 | 7.37186115 | 9.62531552 | 5.27265384 | 5.44393964 | 19.743875  |
| 9.53894491 | 7.46699052 | 0          | 0.88209962 | 1.95653784 | 2.90270735 | 40.7833456 |
| 158.176253 | 155.851613 | 140.178477 | 111.619768 | 136.991111 | 118.857324 | 245.117015 |
| 40.0150655 | 37.9093365 | 24.925299  | 22.6116787 | 24.5265994 | 19.5641179 | 46.2043713 |
| 61.3839356 | 48.0706019 | 73.3883031 | 47.4901521 | 42.4790588 | 36.8468025 | 37.0807484 |
| 17.3091282 | 17.9356001 | 11.7926146 | 10.6979985 | 8.33106437 | 6.98004137 | 60.7759732 |
| 29.8839527 | 34.7993768 | 32.5756383 | 38.7231753 | 19.1779452 | 25.4292252 | 121.435404 |
| 46.6456407 | 47.5996772 | 32.5586718 | 39.8527476 | 30.2353769 | 31.9036683 | 95.717809  |
| 87.6919304 | 93.3407209 | 113.071977 | 96.3398949 | 69.070336  | 78.1072981 | 174.568215 |
| 38.8327066 | 38.093701  | 36.6291815 | 27.5883961 | 22.3535992 | 24.5658492 | 77.3286942 |
| 43.6979412 | 36.4392226 | 37.5116728 | 37.5004084 | 19.2295095 | 23.0867669 | 140.454526 |
| 117.893244 | 108.831109 | 108.611224 | 88.6324089 | 76.9342315 | 68.0542033 | 125.876773 |
| 70.8559453 | 70.1058548 | 99.6404026 | 93.7177062 | 45.218521  | 45.7773763 | 107.888631 |
| 10.2067414 | 10.1444757 | 19.0732723 | 7.45812491 | 4.81235395 | 4.29490258 | 14.4080521 |
| 35.0621278 | 31.8568587 | 49.0932112 | 33.806752  | 22.9443949 | 19.1630074 | 64.2986682 |
| 33.5529076 | 28.6740561 | 52.0346222 | 46.237444  | 17.5050557 | 23.2886663 | 50.6942324 |
| 331.711876 | 295.499793 | 421.854516 | 318.277327 | 176.163125 | 193.094446 | 276.934654 |
| 11.625025  | 11.0967105 | 11.9809    | 12.8772779 | 6.74336153 | 7.58955174 | 29.9125908 |
| 40.9889772 | 44.4949972 | 33.8491715 | 37.2722094 | 25.2797112 | 18.8157637 | 244.091469 |
| 17.7133357 | 16.932837  | 22.6432494 | 26.5864826 | 11.9740116 | 12.2131412 | 62.3008685 |
| 75.7352914 | 67.5778928 | 109.367937 | 92.5618977 | 51.2596678 | 55.0159397 | 319.617514 |
| 73.0274946 | 68.8093946 | 102.141798 | 90.6253991 | 54.2939252 | 57.9039091 | 126.691794 |
| 34.4042469 | 29.1448079 | 44.8366044 | 42.8033242 | 20.1426399 | 19.3982105 | 69.5502355 |
| 115.543502 | 117.607793 | 149.341487 | 144.46621  | 93.5194519 | 120.391488 | 154.673576 |
| 281.498924 | 287.486568 | 473.263983 | 341.297835 | 242.691256 | 238.938063 | 331.718116 |

|            |            |            |            |            |            |            |
|------------|------------|------------|------------|------------|------------|------------|
| 115.835851 | 106.180091 | 170.727138 | 141.653614 | 78.2883797 | 76.1954179 | 285.412518 |
| 119.743392 | 112.520235 | 126.785175 | 133.972752 | 103.775378 | 115.867424 | 117.94894  |
| 81.9850655 | 79.3153993 | 76.183891  | 65.3847928 | 51.7511727 | 54.7955255 | 89.3338775 |
| 21.6341772 | 20.8602614 | 28.7094896 | 26.8260676 | 15.3339734 | 13.4333038 | 63.951117  |
| 14.5710032 | 15.4978015 | 18.8248082 | 20.4266897 | 11.7257337 | 13.5495126 | 34.7520058 |
| 23.7519832 | 23.1048071 | 19.5212593 | 21.2125362 | 14.0503088 | 14.753956  | 71.7039177 |
| 58.4411308 | 65.1016876 | 91.2385136 | 70.9308589 | 43.0438326 | 55.8518555 | 93.4784966 |
| 101.774167 | 94.415706  | 116.53753  | 123.16524  | 66.7806974 | 54.8981373 | 217.811028 |
| 42.5024885 | 45.9778777 | 65.31102   | 46.3191704 | 24.6285811 | 25.4844957 | 117.480138 |
| 49.7678663 | 51.6712842 | 53.163839  | 55.958675  | 44.6279806 | 38.119131  | 43.2508086 |
| 87.288189  | 87.2456775 | 77.3971628 | 83.530999  | 69.0685834 | 80.9978272 | 150.771177 |
| 127.761428 | 130.050675 | 144.427175 | 132.043053 | 85.244141  | 102.433186 | 214.349438 |
| 127.118399 | 116.506979 | 167.23738  | 156.779482 | 74.7462404 | 89.901875  | 209.37723  |
| 14.35323   | 11.4071391 | 16.9672651 | 15.1399936 | 6.80747569 | 7.94556977 | 42.2123548 |
| 28.2882854 | 28.6756356 | 32.316387  | 33.6459214 | 15.9339637 | 16.7600569 | 136.283251 |
| 229.127361 | 206.716236 | 155.774583 | 164.076194 | 108.788865 | 108.255079 | 1198.31938 |
| 114.505744 | 117.421134 | 147.870889 | 121.785075 | 59.2810078 | 61.343742  | 226.784664 |
| 22.2165663 | 20.9876611 | 16.4019476 | 21.4187423 | 10.2764527 | 10.7649695 | 87.3633733 |
| 45.5265467 | 43.6845323 | 71.0780161 | 49.8728747 | 21.2202443 | 23.9031686 | 89.0656349 |
| 33.9777048 | 31.7573828 | 58.7712313 | 28.3432537 | 13.9017163 | 19.8510808 | 132.190644 |
| 54.325286  | 45.3432305 | 62.0723338 | 41.9595771 | 28.3225218 | 26.3175877 | 135.455309 |
| 27.5467951 | 23.1284611 | 23.8317221 | 19.6813002 | 18.9207575 | 19.7892614 | 50.0998494 |
| 19.3251164 | 14.6107489 | 21.2716084 | 16.9145047 | 10.5262715 | 9.3237928  | 67.2613455 |
| 192.182196 | 193.949197 | 216.080098 | 170.634047 | 120.562131 | 128.847077 | 428.356245 |
| 19.6353762 | 17.7183247 | 18.4816476 | 24.0645761 | 12.4747404 | 12.3173564 | 39.7717399 |
| 57.9752835 | 56.3076763 | 51.8643613 | 69.234403  | 31.0830594 | 35.3408274 | 213.608955 |
| 31.2536339 | 32.3417937 | 29.0466108 | 34.0809233 | 17.7167684 | 19.4212214 | 93.8599081 |
| 78.9852932 | 62.5504052 | 71.4386764 | 83.3859799 | 63.2206291 | 54.3305176 | 403.557667 |
| 31.3825783 | 29.7128578 | 23.26565   | 35.25393   | 16.6603045 | 16.9757181 | 48.6123245 |
| 57.3927354 | 53.7402954 | 67.3065226 | 68.0719825 | 38.1137957 | 38.8098382 | 88.8100451 |
| 20.9252884 | 16.7401084 | 12.7029366 | 15.2729521 | 6.80030621 | 8.07318091 | 89.3301559 |
| 174.574201 | 166.977777 | 123.612585 | 199.447957 | 89.4618639 | 112.735127 | 769.329891 |
| 28.7880898 | 27.6684257 | 35.9940218 | 36.339802  | 16.7206493 | 18.7934701 | 63.8453403 |
| 56.7819076 | 55.0734615 | 77.1394512 | 52.8853753 | 32.9821425 | 29.1236775 | 155.537181 |
| 53.686703  | 49.4487057 | 53.6454715 | 35.5968524 | 22.7637844 | 23.5321555 | 186.435588 |
| 25.3112674 | 20.7513193 | 35.7774513 | 28.0745972 | 11.6279548 | 12.7965028 | 60.5277826 |
| 34.4977488 | 27.2352998 | 34.5408933 | 28.58118   | 17.4299409 | 17.4912869 | 138.680174 |
| 89.5677948 | 74.3467574 | 37.715809  | 55.5659855 | 42.3616799 | 30.6837097 | 325.159813 |
| 33.4871176 | 22.894266  | 39.890253  | 36.2581861 | 16.3313365 | 15.4953348 | 108.242277 |
| 179.522441 | 162.076765 | 220.880367 | 148.966738 | 106.571508 | 110.915919 | 348.026817 |
| 45.3008752 | 44.9553879 | 41.8903699 | 38.4934203 | 18.7164827 | 19.165128  | 117.213946 |
| 32.1288847 | 30.7148639 | 26.999375  | 22.3100379 | 14.5240802 | 13.8964466 | 69.4233002 |
| 475.929185 | 452.187304 | 391.046785 | 364.730276 | 242.726862 | 260.539528 | 610.875102 |

|            |            |            |            |            |            |            |
|------------|------------|------------|------------|------------|------------|------------|
| 20.1646916 | 19.2409925 | 20.3468755 | 16.2915272 | 11.3845676 | 10.4724375 | 31.5688709 |
| 25.6975363 | 26.9163593 | 31.2478724 | 34.5883117 | 21.5530173 | 19.7946184 | 56.4217897 |
| 47.7429183 | 47.8139653 | 60.7585492 | 55.2278625 | 31.602243  | 31.2080466 | 109.869543 |
| 28.9920475 | 34.332984  | 35.5538227 | 48.195094  | 21.5957479 | 18.6382565 | 83.6909367 |
| 49.5079738 | 49.4634749 | 31.760019  | 44.0096864 | 25.6050982 | 25.9887415 | 117.313292 |
| 170.505255 | 160.638943 | 604.027297 | 531.096735 | 130.333229 | 131.487486 | 471.268951 |
| 1305.2899  | 1365.66384 | 1344.21037 | 1419.47586 | 1717.43653 | 1658.64027 | 1293.69511 |
| 59.5381601 | 60.5155495 | 19.9694885 | 25.4101364 | 82.9265153 | 75.6568131 | 4.37373669 |
| 103.398929 | 97.0479014 | 80.2594628 | 120.94909  | 100.722568 | 95.190659  | 67.6716331 |
| 134.357999 | 141.3888   | 179.083541 | 214.095388 | 278.81195  | 279.021103 | 65.0421808 |
| 88.8064357 | 87.8154094 | 98.1363067 | 85.7129229 | 89.0129741 | 91.7953519 | 60.9485594 |
| 56.1897893 | 58.1026108 | 35.925216  | 34.6255712 | 86.0695185 | 82.707656  | 15.4933584 |
| 1044.96916 | 1188.63423 | 495.429593 | 381.011957 | 1517.23436 | 1413.25325 | 691.811743 |
| 32.1799787 | 34.5391525 | 17.1683147 | 11.6694328 | 24.2790033 | 23.6729528 | 7.85805984 |
| 364.39949  | 384.53118  | 173.046953 | 190.612148 | 367.019236 | 317.940138 | 56.6144356 |
| 138.852277 | 142.024621 | 140.578686 | 106.586775 | 170.805754 | 160.87478  | 18.2278784 |
| 16.901299  | 13.7897719 | 6.5280545  | 7.44234052 | 21.0094897 | 19.4130895 | 3.84163329 |
| 1.15302088 | 0.81925875 | 0.50274997 | 0          | 2.28326813 | 1.55257775 | 0          |
| 319.237629 | 318.688008 | 337.405169 | 323.905569 | 331.215399 | 333.259985 | 42.8525623 |
| 185.026    | 184.957838 | 102.637293 | 111.217463 | 289.116908 | 277.400787 | 0          |
| 197.187143 | 196.100565 | 321.164488 | 276.949048 | 411.606649 | 429.386349 | 0          |
| 264.679871 | 262.115984 | 210.906376 | 242.790651 | 318.004051 | 318.710089 | 248.839637 |
| 672.032328 | 841.717992 | 587.927639 | 676.9415   | 2240.14812 | 2046.754   | 45.1503724 |
| 2.30223665 | 3.11583588 | 1.91207773 | 1.94394215 | 11.0959818 | 9.96438793 | 0.19474972 |
| 14.8565809 | 9.35822938 | 6.89137531 | 7.76073465 | 32.6885838 | 27.6662665 | 0          |
| 25.9466109 | 28.9080068 | 35.2102645 | 37.629773  | 40.1958196 | 40.5826314 | 28.0785755 |
| 284.389599 | 290.661734 | 346.748899 | 340.58678  | 424.477795 | 377.871596 | 4.0694728  |
| 1539.45139 | 1541.92986 | 1443.53698 | 1317.75506 | 1727.54767 | 1717.72243 | 432.395149 |
| 7.30060629 | 10.6628196 | 4.24436329 | 3.98316443 | 14.9924614 | 15.2918715 | 0          |
| 62.0164761 | 78.8149436 | 45.5079428 | 83.3515939 | 87.1970423 | 95.3881628 | 57.5020302 |
| 45.0971753 | 47.9024175 | 43.7406362 | 55.0756891 | 58.4895941 | 62.1636186 | 32.4733606 |
| 52.544942  | 58.486498  | 41.0712417 | 38.890951  | 137.458948 | 140.661165 | 3.25611622 |
| 16.0688565 | 23.121347  | 12.4308508 | 6.36319313 | 25.0913018 | 25.9801565 | 0.15346813 |
| 426.668245 | 456.190605 | 281.202873 | 364.217142 | 522.04432  | 464.808868 | 8.63930968 |
| 174.806422 | 174.93226  | 156.561198 | 250.462246 | 207.557515 | 220.89168  | 519.788051 |
| 836.398076 | 831.246406 | 506.478306 | 826.230534 | 771.859727 | 743.951821 | 600.112614 |
| 817.167279 | 784.499883 | 854.181789 | 935.63405  | 1322.98241 | 1249.07974 | 183.215947 |
| 14.4875455 | 16.9546113 | 4.08745949 | 2.55727768 | 50.4400381 | 47.6222789 | 0          |
| 335.770395 | 339.769871 | 341.143824 | 408.949294 | 433.283501 | 444.263823 | 330.780872 |
| 248.605599 | 236.023529 | 250.269942 | 266.087997 | 255.680366 | 308.202209 | 360.934332 |
| 167.432565 | 158.840784 | 137.137162 | 156.456048 | 197.089493 | 211.405485 | 108.729349 |
| 125.059056 | 127.741051 | 64.8429101 | 71.1702333 | 137.6853   | 131.657788 | 19.6780113 |
| 45.9966414 | 48.7610032 | 24.4531182 | 22.4785676 | 49.1955287 | 50.454005  | 2.79647322 |

|            |            |            |            |            |            |            |
|------------|------------|------------|------------|------------|------------|------------|
| 31.5126854 | 28.4164402 | 18.2785526 | 24.4489336 | 34.3502506 | 34.7118399 | 268.600478 |
| 23.8238976 | 22.4336896 | 20.9433438 | 21.8033773 | 20.9676635 | 23.8872321 | 49.8640467 |
| 4.94063564 | 6.38269441 | 4.56963815 | 2.45052676 | 18.1179397 | 18.31177   | 0.39893884 |
| 17.9005179 | 18.983431  | 8.73709267 | 8.01720135 | 28.5108239 | 24.5832664 | 1.42383028 |
| 22.3066686 | 19.8851218 | 16.5096604 | 17.5145643 | 31.7848217 | 38.885032  | 19.8130299 |
| 17.7622777 | 17.6732814 | 9.58126938 | 16.4846667 | 54.7952689 | 44.7938461 | 0.81322946 |
| 813.314167 | 825.156539 | 534.02949  | 405.773431 | 1102.58433 | 1070.36491 | 17.0072813 |
| 1463.24413 | 1528.73301 | 1043.98936 | 772.439879 | 2452.98399 | 2451.07181 | 24.5063945 |
| 678.628092 | 695.37656  | 586.254241 | 437.235368 | 936.756384 | 914.745274 | 62.4531496 |
| 114.145257 | 117.21024  | 64.4782774 | 72.083276  | 171.142414 | 159.948795 | 9.53561134 |
| 61.8821219 | 71.4423746 | 36.6915063 | 34.9632509 | 90.5819477 | 88.9044834 | 37.2561944 |
| 265.386245 | 292.344112 | 203.311571 | 226.316576 | 438.802819 | 467.045113 | 9.23333602 |
| 65.4364013 | 63.5538876 | 70.5605891 | 53.2956809 | 154.336309 | 148.834452 | 77.3557348 |
| 295.791364 | 274.526778 | 203.440291 | 221.739998 | 488.762719 | 525.52428  | 494.694802 |
| 464.582038 | 477.484009 | 243.202421 | 295.75925  | 521.454674 | 499.694976 | 234.377077 |
| 359.83082  | 375.537694 | 304.264426 | 365.477574 | 471.539418 | 554.52099  | 261.816416 |
| 22.9532164 | 25.0657362 | 20.076443  | 15.9351193 | 29.787945  | 31.4624245 | 16.1145132 |
| 71.6348134 | 78.4435229 | 38.1027181 | 38.5537531 | 113.227435 | 108.467344 | 27.5971811 |
| 66.1464508 | 75.4521462 | 28.6296667 | 41.7943431 | 65.2791825 | 45.2981714 | 29.808005  |
| 37.8477585 | 46.7974581 | 27.5045028 | 32.1383098 | 67.1511002 | 65.9939615 | 29.3323041 |
| 372.580697 | 381.466272 | 280.216001 | 366.204057 | 366.651651 | 382.317587 | 229.504762 |
| 933.077038 | 861.864233 | 737.466329 | 431.327175 | 889.754159 | 856.117248 | 30.7929165 |
| 20.8782762 | 24.7244878 | 11.2620911 | 10.8626039 | 32.6775306 | 36.2283958 | 0          |
| 33.5034276 | 34.2029775 | 8.05983422 | 13.8670228 | 47.5346261 | 45.6319308 | 1.84705543 |
| 275.950048 | 297.131132 | 191.463445 | 198.875562 | 404.001549 | 402.4131   | 7.26784736 |
| 1362.02417 | 1437.13963 | 1123.34762 | 967.467963 | 2187.25416 | 2201.55955 | 178.268671 |
| 108.632935 | 109.435324 | 42.0584172 | 49.5339486 | 84.9704188 | 83.4574372 | 24.9743461 |



| MiaPaca2 V | MiaPaca2 T | MiaPaca2 T | MiaPaca2 P | MiaPaca2 P | MiaPaca2 C | MiaPaca2 C |
|------------|------------|------------|------------|------------|------------|------------|
| 943.549282 | 1394.72638 | 1316.53864 | 1530.99514 | 1553.34544 | 1411.72189 | 1512.74601 |
| 54.658815  | 139.312955 | 155.592648 | 139.058529 | 137.474793 | 251.697305 | 276.252527 |
| 11.1364693 | 16.0000155 | 15.1453278 | 11.5814617 | 6.16646883 | 16.9733922 | 23.1221021 |
| 438.099004 | 560.423934 | 509.263493 | 692.55109  | 767.948498 | 1394.14083 | 1370.16202 |
| 155.842048 | 240.148047 | 288.3999   | 227.118102 | 231.385003 | 791.524796 | 740.268098 |
| 12.6886535 | 44.100692  | 37.6987261 | 45.7853158 | 49.0911858 | 49.9688675 | 50.8892693 |
| 20.2039814 | 45.0318725 | 42.7418819 | 32.7361981 | 37.0390928 | 86.8041854 | 88.2319643 |
| 5.13823736 | 12.2490185 | 12.8830015 | 15.646478  | 13.6461199 | 14.6184745 | 17.2458725 |
| 14.9779614 | 23.5217136 | 20.3836635 | 24.9147672 | 24.7182704 | 10.0162167 | 11.0889178 |
| 161.371275 | 247.517286 | 211.747726 | 302.702438 | 330.638392 | 515.030956 | 551.629085 |
| 78.9111805 | 86.072293  | 86.0646017 | 82.2934423 | 89.8563634 | 129.522239 | 119.026866 |
| 54.3096343 | 38.0055162 | 41.948647  | 82.6486664 | 80.4266386 | 68.1641105 | 68.8589835 |
| 92.5477236 | 90.0973496 | 96.7184591 | 123.647489 | 112.278638 | 138.628336 | 138.937398 |
| 18.0602602 | 20.8981765 | 14.9970623 | 24.8635785 | 30.09436   | 17.8876956 | 16.8351086 |
| 918.223808 | 1194.1777  | 1328.41042 | 1131.63213 | 1083.91035 | 2476.50043 | 2353.44997 |
| 145.326019 | 121.088712 | 107.478946 | 139.351684 | 147.527787 | 77.793468  | 85.1375491 |
| 22.9970678 | 33.9765483 | 28.3216608 | 35.0298873 | 35.9732713 | 21.0302694 | 19.3799398 |
| 21.0577601 | 38.4046686 | 34.5176444 | 27.5204773 | 29.7613476 | 10.5265928 | 8.69781812 |
| 41.9034677 | 53.7839516 | 48.2314021 | 39.4131285 | 33.1383996 | 5.40530065 | 5.59474187 |
| 201.904125 | 112.886494 | 83.9096195 | 154.695238 | 147.463285 | 82.1664157 | 92.3372074 |
| 38.2525583 | 55.7983224 | 50.5281356 | 42.8288469 | 37.2478242 | 24.685815  | 26.4815633 |
| 39.6433855 | 47.3812392 | 50.1374541 | 40.779336  | 39.0410585 | 21.6072714 | 21.5510127 |
| 56.1478936 | 59.4278096 | 59.7644614 | 41.1310897 | 34.2186922 | 21.4748609 | 26.2654293 |
| 128.438438 | 115.76362  | 110.061285 | 97.1892675 | 99.2511475 | 46.4859679 | 47.536033  |
| 104.646002 | 106.559955 | 109.642107 | 86.4705162 | 83.6735522 | 63.6195191 | 62.32574   |
| 171.748128 | 169.068897 | 173.421178 | 164.452267 | 159.733651 | 141.645589 | 136.738555 |
| 73.184813  | 66.612893  | 63.6043163 | 50.7739318 | 49.9520044 | 26.6929348 | 29.1913499 |
| 145.849662 | 129.985372 | 116.805491 | 111.269462 | 99.5180068 | 40.4548604 | 40.9538576 |
| 127.670967 | 84.2451898 | 80.7706455 | 72.6640039 | 68.121057  | 59.4844312 | 54.2292534 |
| 123.755332 | 98.0117092 | 65.2398336 | 66.5429628 | 64.4229477 | 8.97312867 | 10.272014  |
| 19.7523284 | 12.9242361 | 13.5931669 | 11.8212435 | 8.99356498 | 4.82406297 | 4.88292839 |
| 58.6067794 | 59.9334485 | 52.8078653 | 51.3759605 | 48.950647  | 32.6318928 | 33.7404064 |
| 50.3586892 | 26.0421994 | 27.2308432 | 23.9820444 | 25.8213311 | 12.5282975 | 8.49476048 |
| 283.377464 | 210.380213 | 198.454255 | 188.53047  | 182.748145 | 83.2584499 | 79.2267217 |
| 31.0013765 | 21.8957128 | 22.4775897 | 22.5326397 | 22.9984118 | 10.6978557 | 8.3365402  |
| 237.186595 | 134.832817 | 139.810104 | 112.505628 | 111.971165 | 54.0708812 | 48.1812409 |
| 65.901383  | 51.3778275 | 46.3736    | 54.0140655 | 50.1330802 | 13.0808276 | 14.6113001 |
| 316.215987 | 224.555926 | 223.995837 | 204.146623 | 181.682324 | 79.6066962 | 78.1983309 |
| 135.625534 | 115.746072 | 109.954618 | 99.0017562 | 91.2360743 | 33.9098158 | 33.4077152 |
| 66.0755831 | 42.6802509 | 37.7540486 | 37.8533143 | 33.9936847 | 12.5746771 | 11.5498674 |
| 183.551636 | 105.485102 | 80.9289015 | 103.672178 | 105.116615 | 46.3705118 | 49.4415573 |
| 314.541622 | 215.424208 | 212.556262 | 246.685134 | 221.453312 | 146.293667 | 152.143432 |

|            |            |            |            |            |            |            |
|------------|------------|------------|------------|------------|------------|------------|
| 285.542161 | 164.807801 | 148.367951 | 145.75356  | 134.722158 | 44.2210067 | 49.6331451 |
| 125.407341 | 87.3890745 | 99.9228376 | 83.9768925 | 83.4277526 | 59.6419398 | 71.8168281 |
| 79.2618267 | 65.4969251 | 68.6806575 | 50.0979258 | 46.4799549 | 68.6493814 | 74.2643087 |
| 61.5194699 | 54.9460787 | 48.0664534 | 49.0538744 | 50.8494088 | 12.8648256 | 14.1270541 |
| 36.8173992 | 27.9330027 | 25.807342  | 25.1952258 | 24.5808206 | 10.7127467 | 9.93984617 |
| 71.1017704 | 52.2717136 | 48.2297884 | 39.8407242 | 36.1931364 | 28.4261159 | 25.9876088 |
| 86.0061225 | 57.0142136 | 62.929204  | 52.0595661 | 53.2627661 | 28.9765168 | 25.1546357 |
| 250.787504 | 163.122399 | 151.822747 | 171.556609 | 158.188964 | 63.525031  | 60.6806452 |
| 110.28437  | 91.7416121 | 79.4623213 | 84.4137741 | 79.6366496 | 13.2575955 | 13.7624797 |
| 44.1554218 | 38.2648454 | 33.5730962 | 31.8137103 | 32.6965864 | 16.0234441 | 19.7736269 |
| 147.042805 | 109.652008 | 107.853315 | 86.1191678 | 82.423214  | 59.4019198 | 54.0235399 |
| 222.551677 | 154.306084 | 148.132877 | 139.781628 | 134.456469 | 101.072464 | 87.3746175 |
| 200.31782  | 151.788436 | 146.639918 | 148.684823 | 151.590227 | 48.1710974 | 41.0473278 |
| 42.6876375 | 37.9190705 | 30.13152   | 27.1073342 | 30.7510741 | 5.24299475 | 4.69981857 |
| 146.265848 | 87.566837  | 98.1418108 | 88.0667446 | 79.8856922 | 35.3081464 | 35.114092  |
| 1316.34811 | 763.013523 | 736.578438 | 635.493047 | 583.228898 | 251.98512  | 248.364634 |
| 214.242217 | 147.825529 | 141.270306 | 153.619228 | 123.867708 | 45.3872131 | 43.5390828 |
| 97.5064981 | 74.259894  | 66.4576483 | 59.1162708 | 50.7239366 | 15.6851765 | 16.0070991 |
| 81.7032879 | 60.6641187 | 53.1002059 | 53.52421   | 51.7672897 | 17.6417469 | 18.8490762 |
| 128.235277 | 98.3307703 | 89.0059756 | 77.246687  | 77.807412  | 20.7321729 | 21.6285692 |
| 126.054128 | 95.1158293 | 80.4529073 | 64.164455  | 66.6634824 | 24.4657672 | 30.9297512 |
| 48.7181023 | 35.8538978 | 38.4477074 | 35.3675597 | 30.0583451 | 15.2275776 | 13.5038436 |
| 66.2049422 | 47.6673086 | 44.9471431 | 40.3342933 | 32.7335986 | 9.20732188 | 8.08074893 |
| 381.920101 | 250.42282  | 271.267147 | 209.950434 | 202.373418 | 132.454604 | 133.798663 |
| 41.2001899 | 25.8474873 | 23.1158423 | 20.2151316 | 22.5055494 | 9.28577266 | 8.0475382  |
| 238.851723 | 183.230929 | 165.63036  | 172.128921 | 157.149374 | 44.2994334 | 38.6726995 |
| 96.1120545 | 69.4363708 | 70.1640694 | 54.3962854 | 51.8311548 | 23.4742574 | 22.6560625 |
| 419.067661 | 237.622452 | 238.10068  | 245.012256 | 212.24429  | 102.875259 | 100.998626 |
| 60.0041925 | 34.6823961 | 29.4347301 | 27.3848769 | 25.0723778 | 6.29436774 | 6.02507258 |
| 90.1293424 | 67.9223685 | 67.1633667 | 61.7779749 | 56.5352797 | 28.131971  | 24.8749312 |
| 86.9276399 | 77.0445637 | 74.244552  | 49.9152666 | 45.8989351 | 18.3508013 | 18.3246818 |
| 838.703549 | 577.347451 | 571.85378  | 484.147629 | 421.300249 | 236.258591 | 223.742262 |
| 65.6824416 | 39.6551952 | 38.6893455 | 37.4574424 | 34.462764  | 8.63494034 | 9.78032042 |
| 148.417815 | 110.545795 | 98.9053291 | 88.9654159 | 80.1520364 | 17.8562741 | 21.049182  |
| 181.209129 | 102.891647 | 103.368355 | 68.2687008 | 64.2700948 | 35.8355123 | 35.270692  |
| 51.7521607 | 43.0989358 | 43.0247473 | 37.9462109 | 46.1011737 | 9.6866318  | 9.9355636  |
| 138.133321 | 83.4423642 | 87.8788047 | 75.7249418 | 65.3095278 | 44.4966468 | 42.5023836 |
| 353.576598 | 300.938907 | 260.89354  | 221.846478 | 197.345326 | 21.3781354 | 18.9996988 |
| 114.042749 | 71.9289584 | 68.6588195 | 70.2608675 | 47.1734866 | 14.4273834 | 12.7171561 |
| 335.356201 | 329.01404  | 313.675435 | 271.199769 | 255.372392 | 136.044642 | 132.054047 |
| 115.771837 | 96.5451483 | 79.7962565 | 73.7851896 | 70.5685646 | 15.7995975 | 16.4588362 |
| 55.2983396 | 50.6277862 | 52.6027397 | 42.0682954 | 40.2068499 | 23.1106194 | 28.4308262 |
| 623.93188  | 494.672145 | 436.940078 | 369.774356 | 361.294854 | 171.685862 | 187.939336 |

|            |            |            |            |            |            |            |
|------------|------------|------------|------------|------------|------------|------------|
| 33.1794646 | 24.2566563 | 23.5085585 | 18.2771433 | 19.0276041 | 13.4724261 | 14.1965007 |
| 57.3614001 | 49.150465  | 41.933363  | 47.1347638 | 43.2436251 | 41.8227327 | 44.7795816 |
| 106.928373 | 69.8425154 | 67.6733661 | 69.481257  | 63.7293453 | 38.50422   | 39.396822  |
| 89.5106343 | 61.3361371 | 50.8856459 | 50.656479  | 56.5506443 | 12.6208671 | 10.7876703 |
| 126.721045 | 80.8528254 | 71.5196036 | 62.9344264 | 59.2548526 | 40.1905679 | 38.5580109 |
| 454.072017 | 84.847309  | 92.8504363 | 79.286961  | 67.3442391 | 699.276474 | 743.584893 |
| 1450.26138 | 1698.87049 | 1879.29084 | 1666.71905 | 1688.68557 | 1768.40675 | 1465.54629 |
| 4.1814267  | 76.4487603 | 63.9661935 | 59.3388523 | 68.0098014 | 17.7485315 | 18.5659672 |
| 66.6676782 | 105.931739 | 108.761812 | 119.920771 | 117.457217 | 109.700577 | 108.274498 |
| 61.7331808 | 93.3720011 | 100.256775 | 110.013415 | 103.123877 | 85.1554779 | 70.014394  |
| 59.4117878 | 82.3042867 | 76.7835523 | 89.2945152 | 90.7326897 | 70.7562102 | 82.7766978 |
| 13.4230875 | 45.0963899 | 36.5980164 | 41.3358578 | 52.7795918 | 32.0540937 | 34.8829858 |
| 669.066498 | 841.789212 | 802.244073 | 1506.64139 | 1539.12314 | 503.682619 | 587.11759  |
| 6.53741584 | 167.155251 | 167.302954 | 127.741412 | 128.541166 | 44.2859327 | 48.4019265 |
| 58.4143025 | 163.187772 | 182.374989 | 111.083938 | 124.163366 | 159.824661 | 165.392522 |
| 19.3688563 | 89.3273591 | 66.8708294 | 78.6260921 | 103.20902  | 16.0059639 | 16.399426  |
| 3.38837992 | 8.50471974 | 6.43298022 | 6.77117204 | 5.55646384 | 3.89310345 | 4.38236364 |
| 0          | 0          | 0          | 0.12893572 | 0          | 0          | 0.12870849 |
| 40.0873264 | 140.420539 | 131.102305 | 119.462159 | 126.840533 | 295.016885 | 325.931126 |
| 0.03461134 | 0.18564707 | 1.24475552 | 1.06712655 | 0.46954104 | 2.95411644 | 2.89983605 |
| 0.11587124 | 0          | 0.24512767 | 0.59541789 | 0.6736805  | 0.24724347 | 0          |
| 250.098528 | 217.819405 | 208.962991 | 231.501965 | 240.388945 | 309.411883 | 298.910339 |
| 47.0586897 | 33.4358526 | 24.6978042 | 68.199924  | 82.8904376 | 282.478216 | 289.69312  |
| 0.07157178 | 0.28792058 | 0.75705683 | 1.47111967 | 1.10965722 | 4.42882939 | 2.3251678  |
| 0          | 0.55344159 | 0.43656491 | 1.41389478 | 0.79986961 | 1.76133226 | 1.76425375 |
| 29.5570987 | 29.3433066 | 27.2785448 | 38.3703404 | 42.8108258 | 52.9625989 | 55.3852577 |
| 2.56381277 | 15.7571404 | 19.4352529 | 8.78296722 | 9.52335463 | 29.632451  | 40.9149464 |
| 446.51429  | 639.258738 | 600.122828 | 1107.26693 | 1187.12101 | 1606.80358 | 1603.37944 |
| 0.07943626 | 0.63911603 | 0.50414648 | 0.54425667 | 0.76974322 | 2.20349117 | 0.95077061 |
| 55.2996501 | 80.5095853 | 73.1171205 | 82.5427887 | 87.2682483 | 65.3198542 | 80.7088494 |
| 34.9677033 | 44.3039163 | 42.0367883 | 49.6642836 | 54.6883027 | 47.8689246 | 44.6713525 |
| 3.52345081 | 5.43790771 | 5.90688224 | 6.26296511 | 6.82849936 | 11.6320257 | 10.7987839 |
| 0.11280105 | 2.11763371 | 4.05675475 | 1.54571029 | 0.87444038 | 9.86838685 | 9.64366377 |
| 9.31794044 | 11.9703345 | 13.6282351 | 14.3841012 | 14.4466442 | 12.2730943 | 12.5098162 |
| 534.624524 | 666.165462 | 662.074499 | 842.484003 | 864.753488 | 496.234883 | 463.04181  |
| 653.596167 | 619.447606 | 557.582513 | 648.715106 | 601.756726 | 515.10395  | 518.280388 |
| 163.352346 | 680.912039 | 663.335027 | 1026.73572 | 958.231317 | 290.748031 | 313.029983 |
| 0.11127229 | 0          | 0          | 0          | 0.21564733 | 0          | 0          |
| 303.308447 | 469.663281 | 457.688018 | 440.929288 | 441.445316 | 576.88761  | 596.302064 |
| 363.223902 | 365.60462  | 353.077979 | 411.095564 | 431.270497 | 393.405889 | 354.554313 |
| 113.333845 | 145.495529 | 152.03239  | 143.784557 | 149.029296 | 161.50584  | 151.103544 |
| 17.7354824 | 52.4849315 | 57.5086869 | 42.6871912 | 45.2164652 | 52.3937777 | 56.2059611 |
| 2.280258   | 12.9628886 | 15.8306315 | 12.2124718 | 12.0126827 | 26.1781021 | 25.9194952 |

|            |            |            |            |            |            |            |
|------------|------------|------------|------------|------------|------------|------------|
| 281.415288 | 301.433461 | 349.377374 | 311.330229 | 276.900018 | 374.543401 | 385.653123 |
| 50.498215  | 30.5777686 | 36.2998669 | 45.8481304 | 40.595303  | 90.0341772 | 82.3554574 |
| 0.29322519 | 3.80091071 | 3.92871292 | 6.19450629 | 7.95584595 | 8.13380541 | 10.5288143 |
| 0.5232668  | 2.57278954 | 4.42792083 | 2.39010438 | 3.38032908 | 2.97742661 | 4.1753113  |
| 20.3127326 | 29.2558176 | 31.035295  | 27.3374474 | 31.763873  | 37.8389998 | 33.4454342 |
| 0.4781873  | 0.80152617 | 0.7587103  | 0.51192108 | 0.6950505  | 3.95383829 | 3.78153983 |
| 16.1592744 | 90.9673736 | 80.3030457 | 110.192846 | 120.836005 | 103.115609 | 102.700159 |
| 28.8505545 | 194.662605 | 180.518139 | 254.669114 | 270.097272 | 279.791606 | 269.619678 |
| 63.1332033 | 112.629659 | 99.5837736 | 142.709896 | 158.367332 | 130.116771 | 136.145611 |
| 8.41055654 | 22.859293  | 22.1930226 | 21.9965763 | 24.6249394 | 32.5155308 | 33.5552457 |
| 39.8924241 | 35.1333673 | 30.7534296 | 35.3234581 | 44.2251436 | 92.6959381 | 105.205564 |
| 10.2128761 | 23.1045604 | 22.9297302 | 31.318742  | 33.0091218 | 38.2414564 | 35.4320203 |
| 74.2220371 | 24.6242662 | 19.9929801 | 54.6171204 | 68.3479493 | 147.552784 | 141.885626 |
| 473.570404 | 1277.76657 | 1233.66548 | 2085.01055 | 2247.6856  | 2066.77076 | 1958.17229 |
| 249.192164 | 364.351158 | 300.709906 | 383.249133 | 399.614247 | 312.042643 | 309.059547 |
| 263.12349  | 243.917866 | 232.877513 | 268.529829 | 250.098582 | 292.312217 | 283.85723  |
| 13.9978974 | 19.251645  | 17.2741338 | 15.2159251 | 19.1288099 | 30.0598643 | 33.1398746 |
| 27.3274374 | 63.466728  | 61.6856581 | 71.6602941 | 78.8954723 | 85.3620182 | 84.5401857 |
| 40.9608044 | 91.9691497 | 98.7444693 | 70.1606228 | 83.0748555 | 172.769908 | 168.305909 |
| 28.5846663 | 32.9705974 | 26.6484003 | 42.9453779 | 41.7828622 | 25.0692889 | 26.5087956 |
| 220.006459 | 265.258376 | 242.066351 | 305.275451 | 313.48193  | 263.022297 | 256.418183 |
| 21.9865276 | 100.154246 | 86.1856489 | 106.05752  | 120.93781  | 136.948538 | 122.732508 |
| 0          | 0.37685448 | 0          | 0          | 0.81698174 | 0.2998356  | 0.24026634 |
| 2.11183703 | 3.6409484  | 2.87204708 | 3.875686   | 2.04638557 | 3.21870757 | 6.96394019 |
| 6.49324618 | 30.3203285 | 31.1752118 | 43.3052011 | 39.9832258 | 39.2071079 | 38.504414  |
| 173.254195 | 378.548238 | 380.275779 | 399.394979 | 439.422479 | 480.949233 | 484.067611 |
| 27.033654  | 65.5991124 | 68.9462016 | 68.697091  | 62.2343566 | 46.4580611 | 47.3139507 |
